# Supplementary material for: A reference collection of patient-derived cell line and xenograft models of proneural, classical and mesenchymal glioblastoma
Source: PubMed Central journal article supplement (PMC6427001; doi:10.1038/s41598-019-41277-z), 2019-03-20
Supplement: 41598_2019_41277_MOESM1_ESM.pdf [file 41598_2019_41277_MOESM1_ESM.pdf]

**A reference collection of patient-derived cell line and xenograft models of proneural, classical and mesenchymal glioblastoma**

**Brett W Stringer<sup>1,\*</sup>, Bryan W Day<sup>1,\*</sup>, Rochelle C J D'Souza<sup>1</sup>, Paul R Jamieson<sup>1</sup>, Kathleen S Ensbey<sup>1</sup>, Zara C Bruce<sup>1</sup>, Yi Chieh Lim<sup>1</sup>, Kate Goasdoué<sup>1</sup>, Carolin Offenhäuser<sup>1</sup>, Seçkin Akgül<sup>1</sup>, Suzanne Allan<sup>1,2</sup>, Thomas Robertson<sup>2</sup>, Peter Lucas<sup>2</sup>, Gert Tolleson<sup>2</sup>, Scott Campbell<sup>2</sup>, Craig Winter<sup>2</sup>, Hongdo Do<sup>3</sup>, Alexander Dobrovic<sup>3</sup>, Po-Ling Inglis<sup>1,2</sup>, Rosalind L Jeffree<sup>2,4</sup>, Terrance G Johns<sup>5,+</sup>, Andrew W Boyd<sup>1,4,+</sup>**

<sup>1</sup>QIMR Berghofer Medical Research Institute, Brisbane, Australia.

<sup>2</sup>Royal Brisbane and Women's Hospital, Brisbane, Australia.

<sup>3</sup>Olivia Newton-John Cancer and Wellness Centre, Melbourne, Australia.

<sup>4</sup>The University of Queensland, Brisbane, Australia.

<sup>5</sup>Hudson Institute of Medical Research, Clayton, Victoria, Australia.

\*Joint first authors.

+Joint senior authors.

Correspondence should be addressed to B.W.S. (brett.w.stringer@gmail.com).

**a**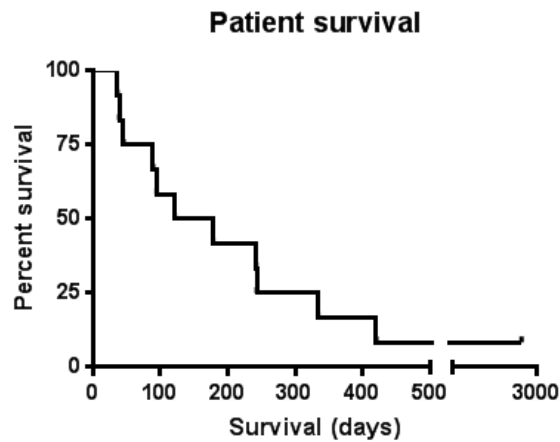**b**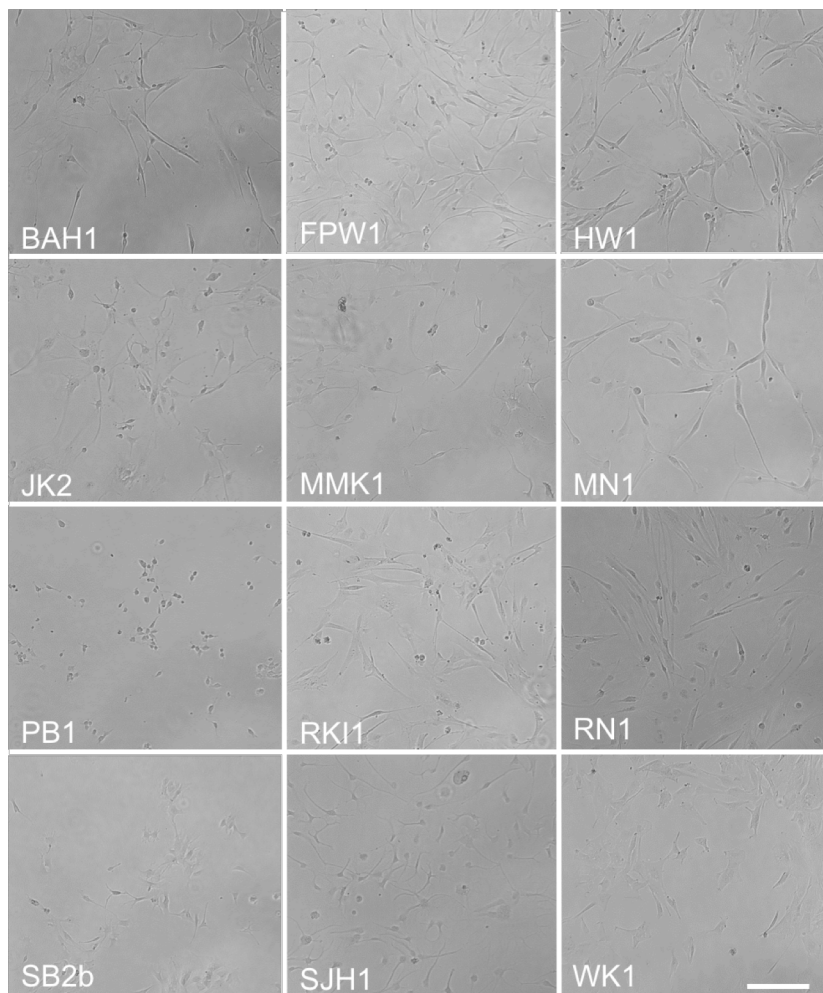

**Supplementary Figure S1.** Patient survival and morphology of low-passage, serum-free, patient-derived GBM cell lines. **(a)** Kaplan-Meier survival analysis of patients from whose tumours the GBM cell lines were established. **(b)** Bright field images of serum-free, adherent cultures of the GBM cell lines illustrating heterogeneity within as well as between the lines. Scale bar, 100  $\mu$ m.

**a****lentiCRISPRv2 plasmid design**

Addgene plasmid #52961

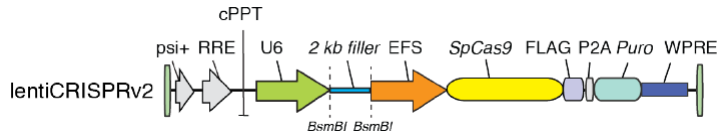

Addgene plasmid #98290

Deleted upstream *MluI* restriction site  
by partial *MluI* digestion, Klenow end-filling  
and religation

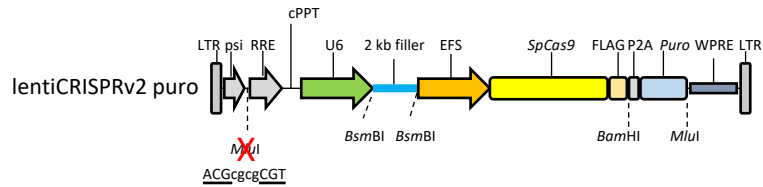

Addgene plasmid #98291

Subcloned P2A-Hygro/Neo/Blast  
between the *Bam*HI and remaining  
*MluI* restriction sites

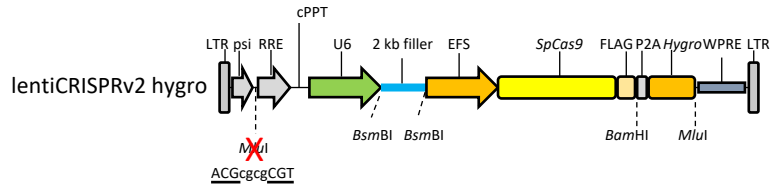

Addgene plasmid #98292

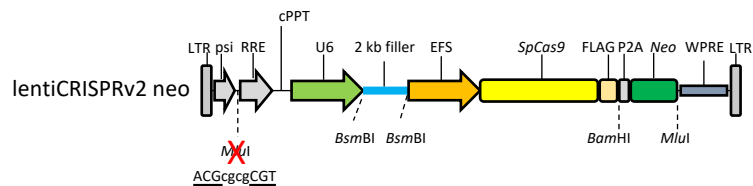

Addgene plasmid #98293

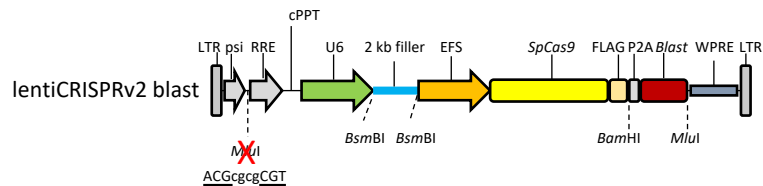

**Supplementary Figure S2.** Construction of lentiviral CRISPR/Cas9 plasmids. All plasmids were derived from lentiCRISPRv2 as shown after deleting the first of two *MluI* restriction sites. **(a)** Construction of the lentiCRISPRv2 series. **(b)** Construction of the lenti-sgRNA and lenti-SpCas9 series.

# lenti-sgRNA and lenti-SpCas9 plasmid design

**b**

Addgene plasmid #52961

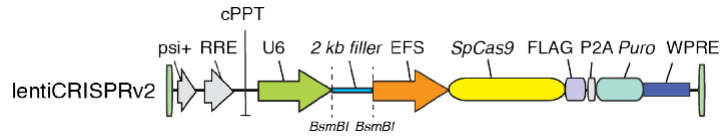

Addgene plasmid #98290

Deleted the upstream *MluI* restriction site by partial *MluI* digestion, Klenow end-filling and religation

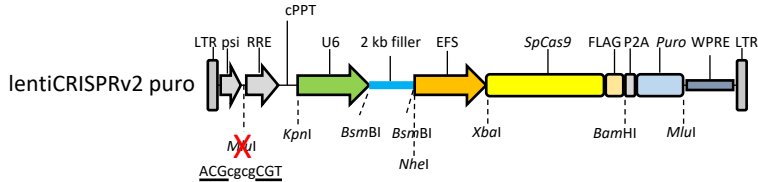

Subcloned PCR-amplified *Puro/Hygro/Neo/Blast* between the *XbaI* and remaining *MluI* restriction site

Cloned a *KpnI-XhoI-BsrGI-NheI* double-stranded oligonucleotide between the *KpnI* and *NheI* restriction site of lentiCRISPRv2 puro/hygro/neo/blast

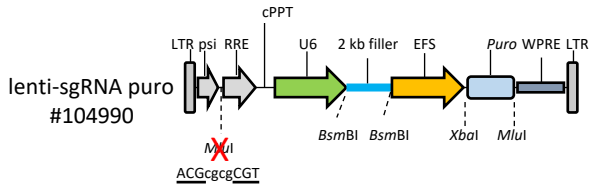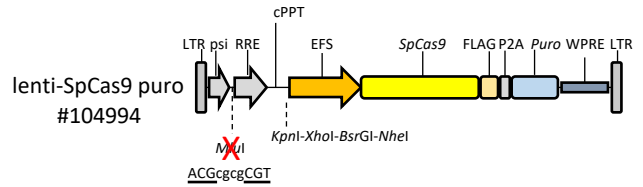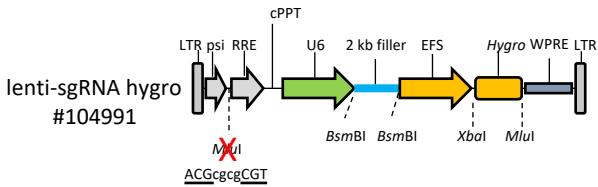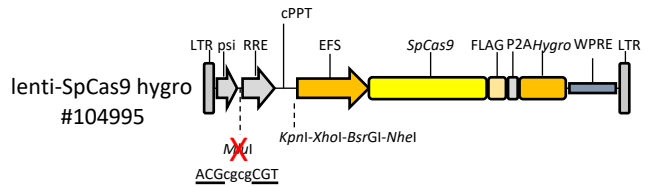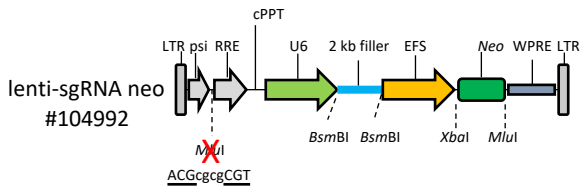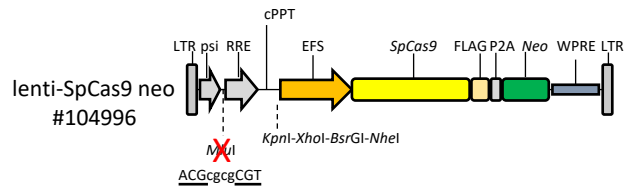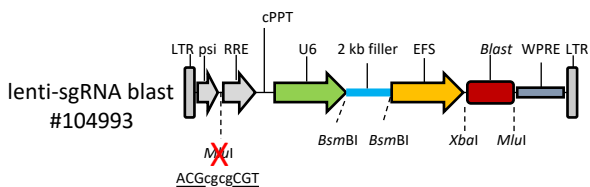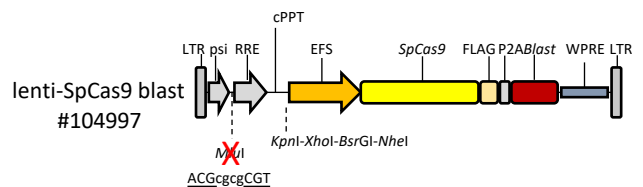

## a Patient tumours

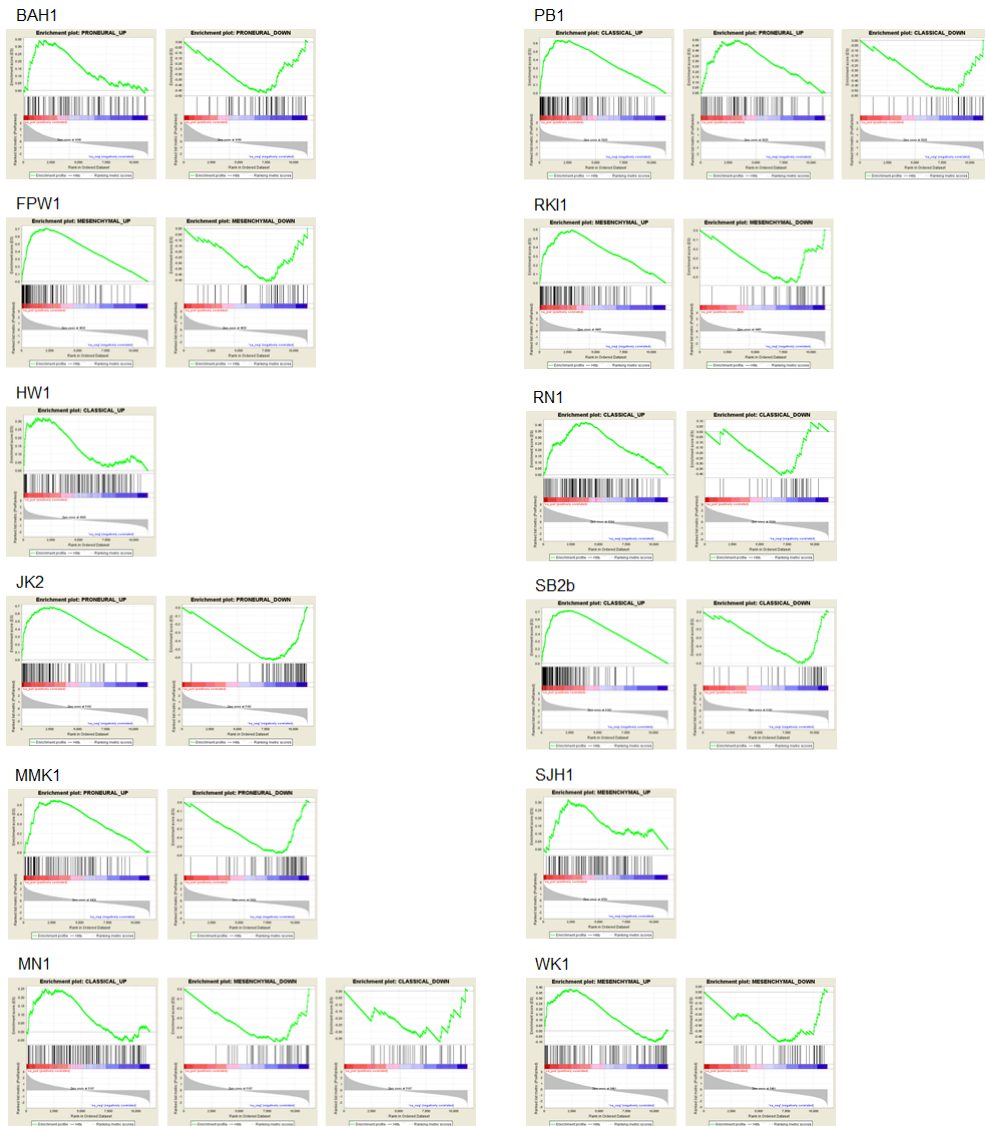

| Gene set enrichment analysis |             |             |             |              |
|------------------------------|-------------|-------------|-------------|--------------|
| Patient tumour               | GBM subtype | NES         | FDR q-value | FWER p-Value |
| BAH1                         | PN          | 2.165       | 0.000       | 0.000        |
| FPW1                         | MES         | 3.062       | 0.000       | 0.000        |
| HW1                          | CL          | 1.501       | 0.036       | 0.067        |
| JK2                          | PN          | 2.901       | 0.000       | 0.000        |
| MMK1                         | PN          | 2.581       | 0.000       | 0.000        |
| MN1                          | MES/CL      | 2.199/1.482 | 0.000/0.017 | 0.000/0.026  |
| PB1                          | CL/PN       | 2.810/2.053 | 0.000/0.000 | 0.000/0.001  |
| RK1                          | MES         | 2.658       | 0.000       | 0.000        |
| RN1                          | CL          | 1.912       | 0.000       | 0.001        |
| SB2b                         | CL          | 3.119       | 0.000       | 0.000        |
| SJH1                         | MES         | 1.384       | 0.054       | 0.257        |
| WK1                          | MES         | 1.907       | 0.005       | 0.002        |

Abbreviations: NES, normalised enrichment score; FDR, false discover rate; FWER, family-wise error rate; CL, Classical; MES, Mesenchymal; PN, Proneural.

**Supplementary Figure S3.** Molecular subtyping by gene set enrichment analysis of patient tumours, GBM cell lines and xenografts initiated by the GBM cell lines. Molecular subtyping as proneural, classical or mesenchymal GBM by gene set enrichment analysis of matched **(a)** patient tumours, **(b)** derived GBM cell lines and **(c)** xenograft tumours initiated by the GBM cell lines following intracranial injection into NOD/SCID mice. Subtyping results along with the associated normalised enrichment scores and false discovery and error rates are summarised in the accompanying tables.

## b GBM cell lines

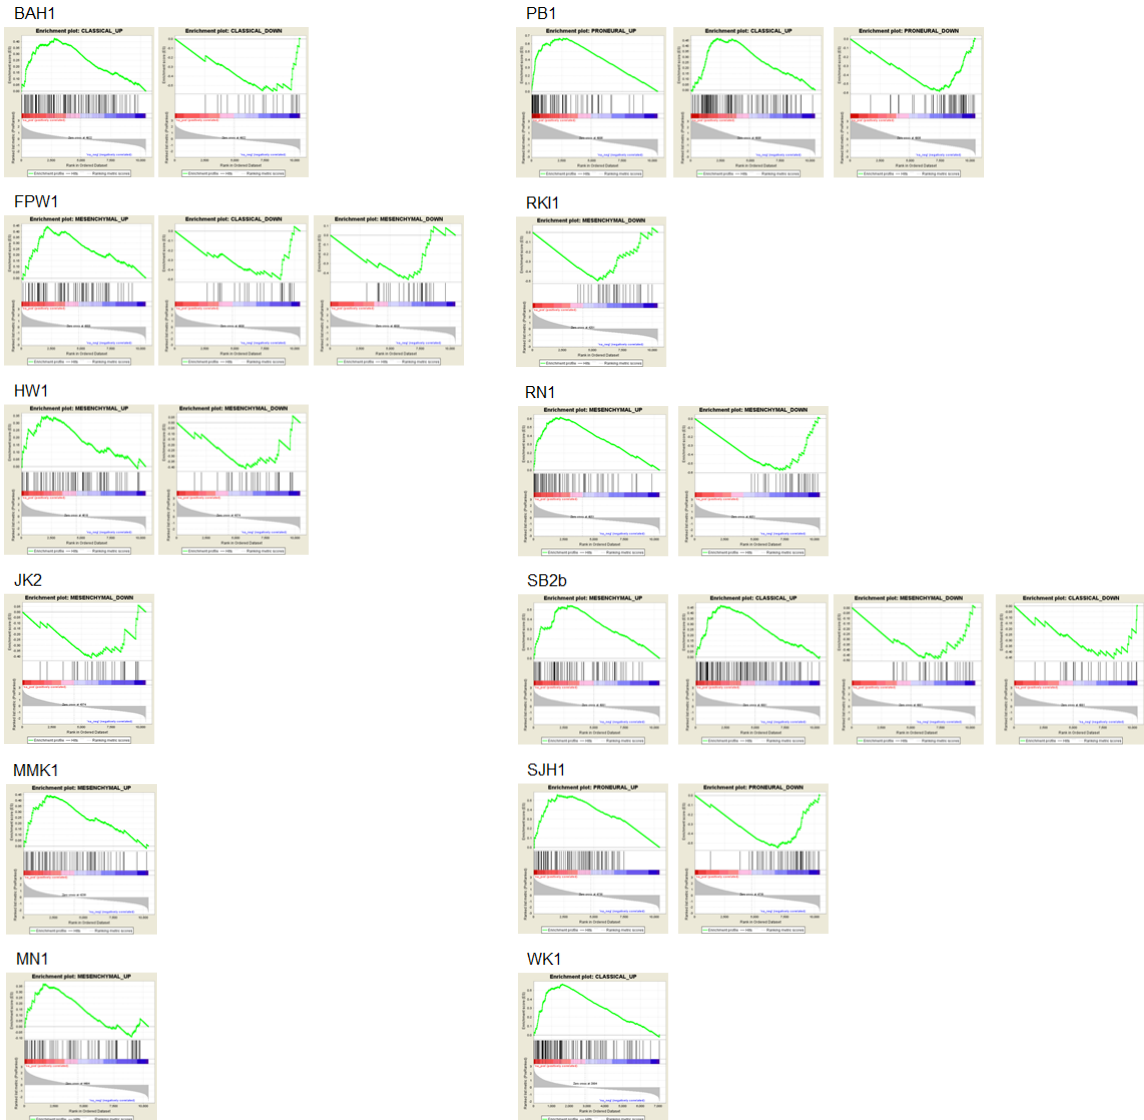

| Gene set enrichment analysis |             |             |             |              |
|------------------------------|-------------|-------------|-------------|--------------|
| Primary GBM cell line        | GBM subtype | NES         | FDR q-value | FWER p-Value |
| BAH1                         | CL          | 1.975       | 0.002       | 0.001        |
| FPW1                         | MES/CL      | 1.749/1.822 | 0.001/0.003 | 0.005/0.003  |
| HW1                          | MES         | 1.389       | 0.133       | 0.265        |
| JK2                          | MES         | 1.563       | 0.024       | 0.039        |
| MMK1                         | MES         | 1.851       | 0.005       | 0.005        |
| MN1                          | MES         | 1.516       | 0.044       | 0.116        |
| PB1                          | PN/CL       | 2.876/1.959 | 0.000/0.000 | 0.000/0.001  |
| RK1                          | MES         | 1.943       | 0.003       | 0.002        |
| RN1                          | MES         | 2.690       | 0.000       | 0.000        |
| SB2b                         | MES/CL      | 2.087/1.929 | 0.000/0.001 | 0.001/0.003  |
| SJH1                         | PN          | 2.479       | 0.000       | 0.000        |
| WK1                          | CL          | 2.383       | 0.000       | 0.000        |

Abbreviations: NES, normalised enrichment score; FDR, false discover rate; FWER, family-wise error rate; CL, Classical; MES, Mesenchymal; PN, Proneural.

## c Xenografts

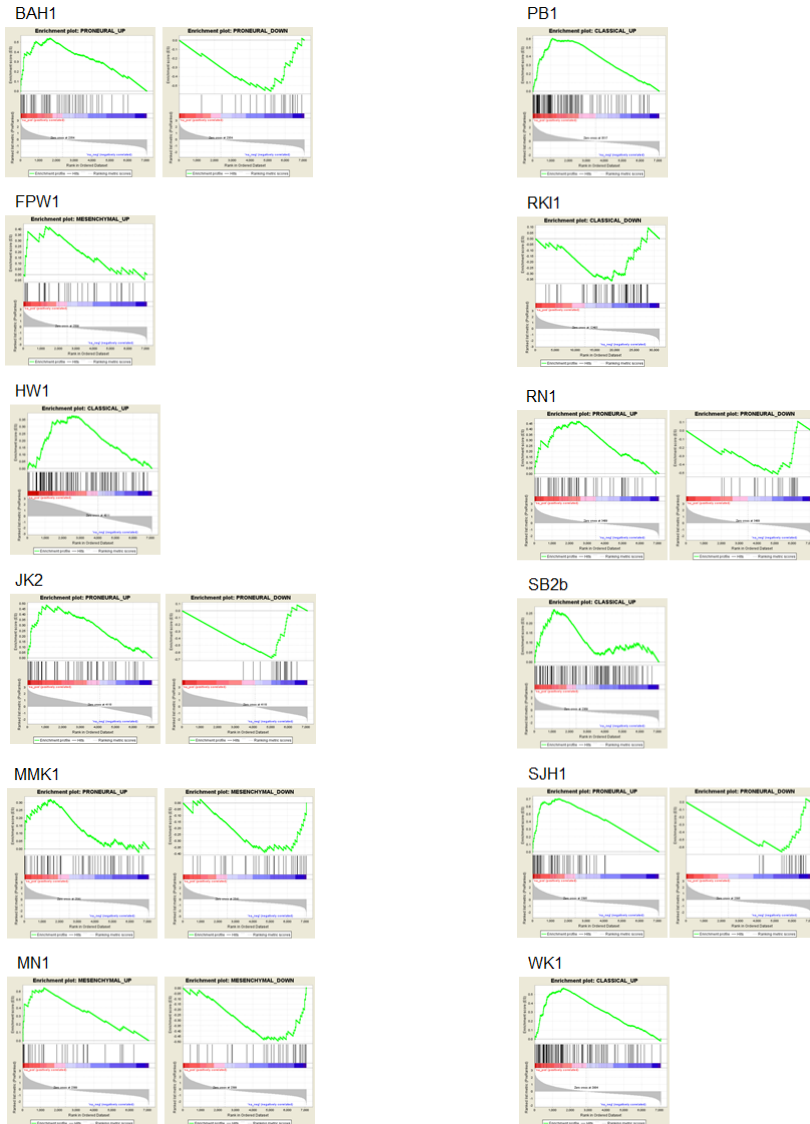

| Gene set enrichment analysis |             |             |             |              |
|------------------------------|-------------|-------------|-------------|--------------|
| Xenograft                    | GBM subtype | NES         | FDR q-value | FWER p-Value |
| BAH1                         | PN          | 2.363       | 0.000       | 0.000        |
| FPW1                         | MES         | 1.506       | 0.038       | 0.107        |
| HW1                          | CL          | 1.541       | 0.075       | 0.092        |
| JK2                          | PN          | 2.761       | 0.000       | 0.000        |
| MMK1                         | PN/MES      | 1.312/1.508 | 0.112/0.076 | 0.386/0.081  |
| MN1                          | MES         | 2.386       | 0.000       | 0.001        |
| PB1                          | CL          | 2.205       | 0.000       | 0.000        |
| RK1                          | CL          | 1.502       | 0.049       | 0.037        |
| RN1                          | PN          | 1.773       | 0.003       | 0.004        |
| SB2b                         | CL          | 1.369       | 0.110       | 0.249        |
| SJH1                         | PN          | 2.969       | 0.000       | 0.000        |
| WK1                          | CL          | 2.316       | 0.000       | 0.000        |

Abbreviations: NES, normalised enrichment score; FDR, false discover rate; FWER, family-wise error rate;  
CL, Classical; MES, Mesenchymal; PN, Proneural.

**a**

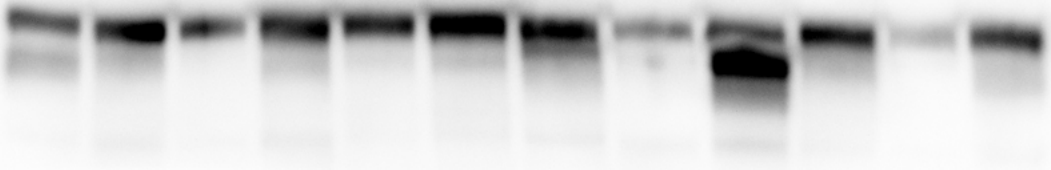

**b**

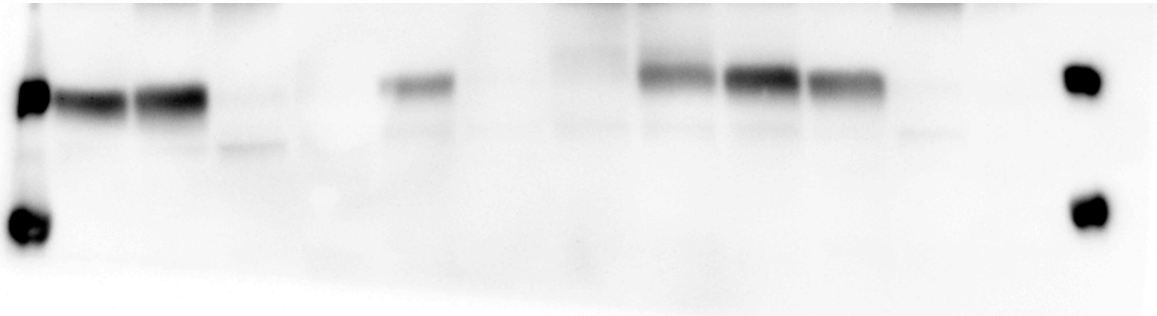

**c**

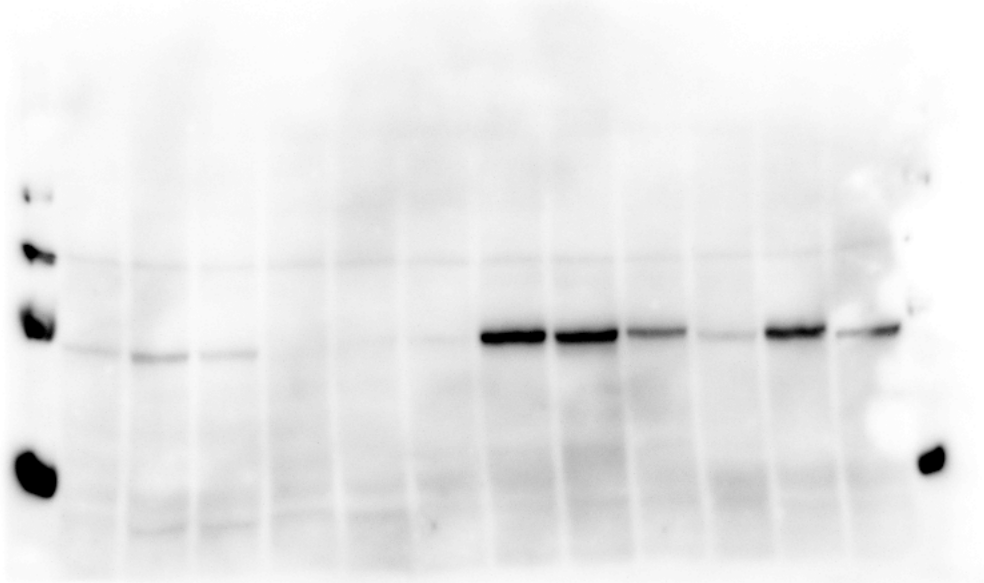

**d**

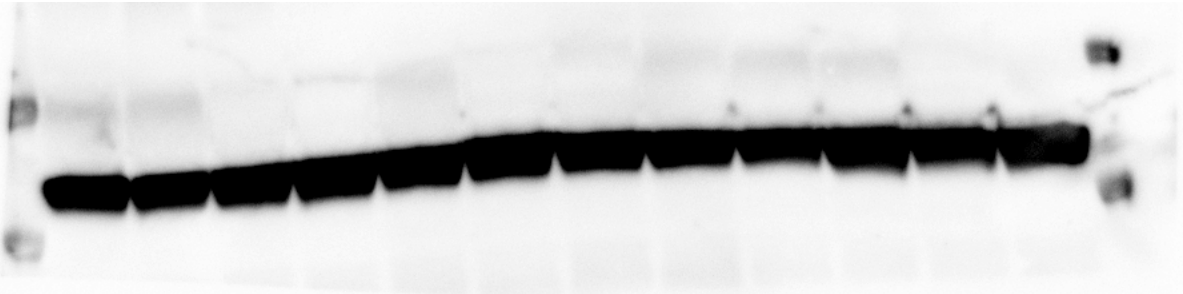

**Supplementary Figure S4.** Full length western blots for Figure 5. **(a)** Egfr, **(b)** PTEN, **(c)** c-myc, **(d)**  $\beta$ -actin.
