# Supplementary material for: A reference collection of patient-derived cell line and xenograft models of proneural, classical and mesenchymal glioblastoma
Source: PubMed Central journal article supplement (PMC6427001; doi:10.1038/s41598-019-41277-z), 2019-03-20
Supplement: 41598_2019_41277_MOESM2_ESM.pdf [file 41598_2019_41277_MOESM2_ESM.pdf]

**A reference collection of patient-derived cell line and xenograft models of proneural, classical and mesenchymal glioblastoma**

**Brett W Stringer<sup>1,\*</sup>, Bryan W Day<sup>1,\*</sup>, Rochelle C J D'Souza<sup>1</sup>, Paul R Jamieson<sup>1</sup>, Kathleen S Ensbey<sup>1</sup>, Zara C Bruce<sup>1</sup>, Yi Chieh Lim<sup>1</sup>, Kate Goasdoué<sup>1</sup>, Carolin Offenhäuser<sup>1</sup>, Seçkin Akgül<sup>1</sup>, Suzanne Allan<sup>1,2</sup>, Thomas Robertson<sup>2</sup>, Peter Lucas<sup>2</sup>, Gert Tolleson<sup>2</sup>, Scott Campbell<sup>2</sup>, Craig Winter<sup>2</sup>, Hongdo Do<sup>3</sup>, Alexander Dobrovic<sup>3</sup>, Po-Ling Inglis<sup>1,2</sup>, Rosalind L Jeffree<sup>2,4</sup>, Terrance G Johns<sup>5,+</sup>, Andrew W Boyd<sup>1,4,+</sup>**

<sup>1</sup>QIMR Berghofer Medical Research Institute, Brisbane, Australia.

<sup>2</sup>Royal Brisbane and Women's Hospital, Brisbane, Australia.

<sup>3</sup>Olivia Newton-John Cancer and Wellness Centre, Melbourne, Australia.

<sup>4</sup>The University of Queensland, Brisbane, Australia.

<sup>5</sup>Hudson Institute of Medical Research, Clayton, Victoria, Australia.

\*Joint first authors.

+Joint senior authors.

Correspondence should be addressed to B.W.S. (brett.w.stringer@gmail.com).

**Supplementary Table S1.** Short tandem repeat profiles of GBM cell lines

| Cells | TH01  | D21S11  | D5S818 | D13S317 | D7S820 | D16S539 | CSF1PO | AMEL | vWA   | TPOX  |
|-------|-------|---------|--------|---------|--------|---------|--------|------|-------|-------|
| BAH1  | 6,8   | 30      | 11     | 12,14   | 9,11   | 9,11    | 10,11  | X    | 17    | 8,11  |
| FPW1  | 9,3   | 27,30   | 13     | 12      | 11     | 9,11    | 11     | X,Y  | 16,17 | 8     |
| HW1   | 6,9   | 28,29   | 11,12  | 12      | 8,10   | 13      | 10,12  | X    | 15,18 | 8     |
| JK2   | 7,9   | 28      | 10,11  | 8,11    | 8      | 12      | 12     | X,Y  | 15,20 | 8,11  |
| MMK1  | 6,10  | 27,33.2 | 12     | 13      | 9,10   | 11,13   | 10,11  | X    | 16,17 | 8     |
| MN1   | 6     | 29,31.2 | 12,13  | 8       | 9,12   | 12,13   | 12     | X    | 17    | 10,11 |
| PB1   | 7,9   | 30      | 10,11  | 12      | 9,11   | 12      | 11,13  | X,Y  | 17    | 8     |
| RK11  | 7,8   | 29,33.2 | 12,13  | 8       | 10,12  | 11,12   | 10     | X    | 16    | 8     |
| RN1   | 6,9,3 | 29      | 12     | 11,12   | 9      | 9       | 11,12  | X,Y  | 14,18 | 8,11  |
| SB2b  | 6,7   | 28,32   | 11,13  | 12      | 11,12  | 9,12    | 10     | X,Y  | 17    | 9,10  |
| SJH1  | 8,9,3 | 29      | 12,13  | 11      | 11     | 11,12   | 10,13  | X,Y  | 15    | 8     |
| WK1   | 6,9,3 | 27,28   | D5S818 | 12,13   | 8,11   | 11,12   | 10,11  | X,Y  | 16,18 | 8     |

Abbreviations: STR=short tandem repeat. Profiles comprise the alleles at 10 STR loci. No significant match (>80% relatedness) was found when compared with profiles in the ATCC cell database ([https://www.atcc.org/STR\\_Database.aspx](https://www.atcc.org/STR_Database.aspx)).

**Supplementary Table S2.** Lentiviral plasmids deposited with Addgene

| <b>Plasmid name</b>  | <b>Addgene reference</b> | <b>Use</b>            | <b>Antibiotic resistance</b> |
|----------------------|--------------------------|-----------------------|------------------------------|
| pF CAG luc puro      | 67501                    | gene expression       | puromycin                    |
| pF CAG luc hygro     | 67502                    | gene expression       | hygromycin                   |
| pF CAG luc IRES neo  | 98294                    | gene expression       | G418                         |
| pF CAG BFP2 IRES neo | 108175                   | fluorescent labelling | G418                         |
| lentiCRISPRv2 puro   | 98290                    | CRISPR/Cas9 cutting   | puromycin                    |
| lentiCRISPRv2 hygro  | 98291                    | CRISPR/Cas9 cutting   | hygromycin                   |
| lentiCRISPRv2 neo    | 98292                    | CRISPR/Cas9 cutting   | G418                         |
| lentiCRISPRv2 blast  | 98293                    | CRISPR/Cas9 cutting   | blasticidin S                |
| lenti-sgRNA puro     | 104990                   | sgRNA expression      | puromycin                    |
| lenti-sgRNA hygro    | 104991                   | sgRNA expression      | hygromycin                   |
| lenti-sgRNA neo      | 104992                   | sgRNA expression      | G418                         |
| lenti-sgRNA blast    | 104993                   | sgRNA expression      | blasticidin S                |
| lenti-SpCas9 puro    | 104994                   | Cas9 expression       | puromycin                    |
| lenti-SpCas9 hygro   | 104995                   | Cas9 expression       | hygromycin                   |
| lenti-SpCas9 neo     | 104996                   | Cas9 expression       | G418                         |
| lenti-SpCas9 blast   | 104997                   | Cas9 expression       | blasticidin S                |
