# Supplementary material for: A reference collection of patient-derived cell line and xenograft models of proneural, classical and mesenchymal glioblastoma
Source: PubMed Central journal article supplement (PMC6427001; doi:10.1038/s41598-019-41277-z), 2019-03-20
Supplement: 41598_2019_41277_MOESM7_ESM.pdf [file 41598_2019_41277_MOESM7_ESM.pdf]

**A reference collection of patient-derived cell line and xenograft models of proneural, classical and mesenchymal glioblastoma**

**Brett W Stringer<sup>1,\*</sup>, Bryan W Day<sup>1,\*</sup>, Rochelle C J D'Souza<sup>1</sup>, Paul R Jamieson<sup>1</sup>, Kathleen S Ensbey<sup>1</sup>, Zara C Bruce<sup>1</sup>, Yi Chieh Lim<sup>1</sup>, Kate Goasdoué<sup>1</sup>, Carolin Offenhäuser<sup>1</sup>, Seçkin Akgül<sup>1</sup>, Suzanne Allan<sup>1,2</sup>, Thomas Robertson<sup>2</sup>, Peter Lucas<sup>2</sup>, Gert Tolleson<sup>2</sup>, Scott Campbell<sup>2</sup>, Craig Winter<sup>2</sup>, Hongdo Do<sup>3</sup>, Alexander Dobrovic<sup>3</sup>, Po-Ling Inglis<sup>1,2</sup>, Rosalind L Jeffree<sup>2,4</sup>, Terrance G Johns<sup>5,+</sup>, Andrew W Boyd<sup>1,4,+</sup>**

<sup>1</sup>QIMR Berghofer Medical Research Institute, Brisbane, Australia.

<sup>2</sup>Royal Brisbane and Women's Hospital, Brisbane, Australia.

<sup>3</sup>Olivia Newton-John Cancer and Wellness Centre, Melbourne, Australia.

<sup>4</sup>The University of Queensland, Brisbane, Australia.

<sup>5</sup>Hudson Institute of Medical Research, Clayton, Victoria, Australia.

\*Joint first authors.

+Joint senior authors.

Correspondence should be addressed to B.W.S. (brett.w.stringer@gmail.com).

# CD133

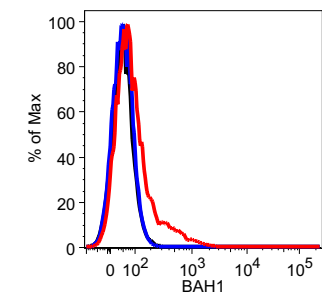

| Sample                     | Mean:PE-A |
|----------------------------|-----------|
| Unfixed_CD133.fcs          | 127       |
| Unfixed_IgG1.fcs           | 46.8      |
| Unfixed_Secondary Only.fcs | 47.1      |

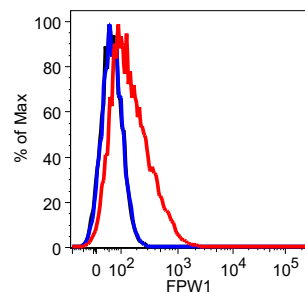

| Sample                     | Mean:PE-A |
|----------------------------|-----------|
| Unfixed_CD133.fcs          | 201       |
| Unfixed_IgG1.fcs           | 62.9      |
| Unfixed_Secondary Only.fcs | 61.4      |

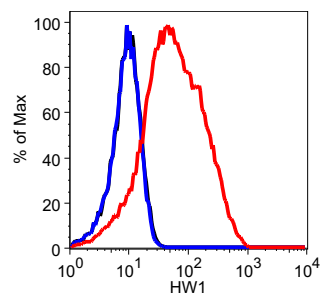

| Sample                           | Mean:PE-A |
|----------------------------------|-----------|
| Unfixed Cells_CD133.fcs          | 99.2      |
| Unfixed Cells_IgG1.fcs           | 9.75      |
| Unfixed Cells_Secondary Only.fcs | 9.96      |

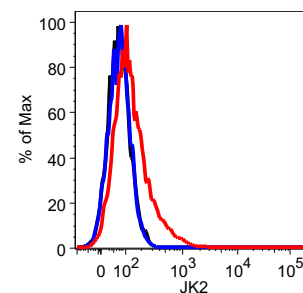

| Sample                     | Mean:PE-A |
|----------------------------|-----------|
| Unfixed_CD133.fcs          | 169       |
| Unfixed_IgG1.fcs           | 73.9      |
| Unfixed_Secondary Only.fcs | 73.1      |

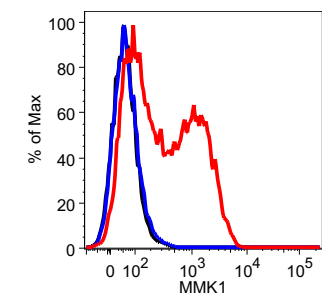

| Sample                  | Mean:PE-A |
|-------------------------|-----------|
| MMK1_CD133.fcs          | 697       |
| MMK1_IgG1.fcs           | 64        |
| MMK1_Secondary Only.fcs | 58.2      |

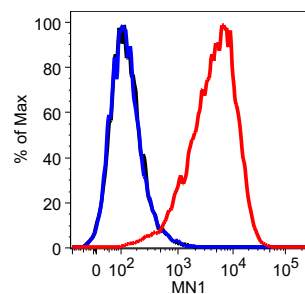

| Sample                     | Mean:PE-A |
|----------------------------|-----------|
| Unfixed_CD133.fcs          | 6439      |
| Unfixed_IgG1.fcs           | 153       |
| Unfixed_Secondary only.fcs | 154       |

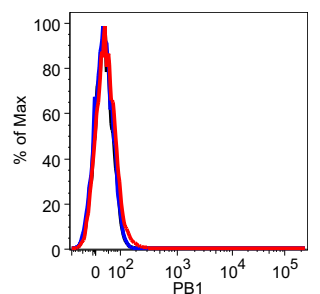

| Sample                     | Mean:PE-A |
|----------------------------|-----------|
| Unfixed_CD133.fcs          | 38.4      |
| Unfixed_IgG1.fcs           | 27.9      |
| Unfixed_Secondary Only.fcs | 29        |

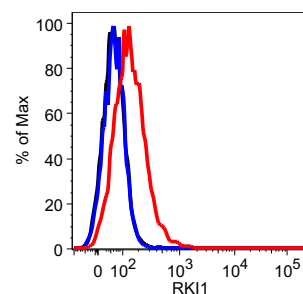

| Sample                     | Mean:PE-A |
|----------------------------|-----------|
| Unfixed_CD133.fcs          | 167       |
| Unfixed_IgG1.fcs           | 63.8      |
| Unfixed_Secondary only.fcs | 63.1      |

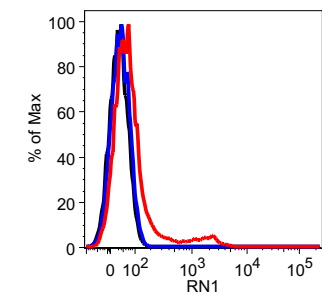

| SampleName                 | Mean:PE-A |
|----------------------------|-----------|
| Unfixed_CD133.fcs          | 174       |
| Unfixed_IgG1.fcs           | 36.7      |
| Unfixed_Secondary only.fcs | 30.7      |

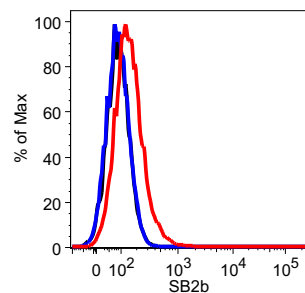

| Sample                     | Mean:PE-A |
|----------------------------|-----------|
| Unfixed_CD133.fcs          | 168       |
| Unfixed_IgG1.fcs           | 89.5      |
| Unfixed_Secondary only.fcs | 90.5      |

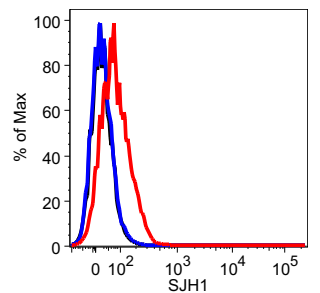

| Sample                     | Mean:PE-A |
|----------------------------|-----------|
| Unfixed_CD133.fcs          | 85.6      |
| Unfixed_IgG1.fcs           | 22.3      |
| Unfixed_Secondary Only.fcs | 21.8      |

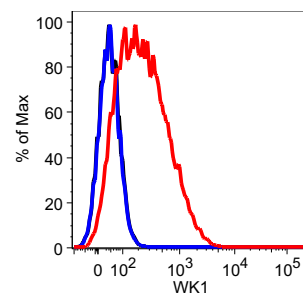

| Sample                     | Mean:PE-A |
|----------------------------|-----------|
| Unfixed_CD133.fcs          | 360       |
| Unfixed_IgG1.fcs           | 42.8      |
| Unfixed_Secondary only.fcs | 43.1      |

# CD15

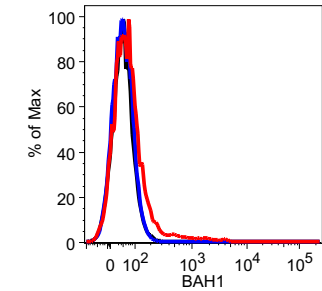

| Sample                     | Mean:PE-A |
|----------------------------|-----------|
| Unfixed_CD15.fcs           | 118       |
| Unfixed_IgG1.fcs           | 46.8      |
| Unfixed_Secondary Only.fcs | 47.1      |

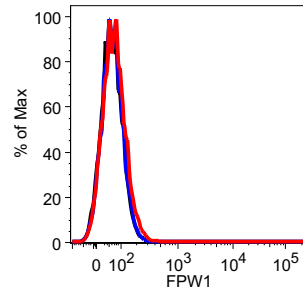

| Sample                     | Mean:PE-A |
|----------------------------|-----------|
| Unfixed_CD15.fcs           | 73.2      |
| Unfixed_IgG1.fcs           | 62.9      |
| Unfixed_Secondary Only.fcs | 61.4      |

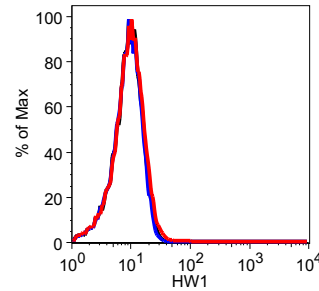

| Sample                           | Mean:PE-A |
|----------------------------------|-----------|
| Unfixed Cells_CD15.fcs           | 11.6      |
| Unfixed Cells_IgG1.fcs           | 9.75      |
| Unfixed Cells_Secondary Only.fcs | 9.96      |

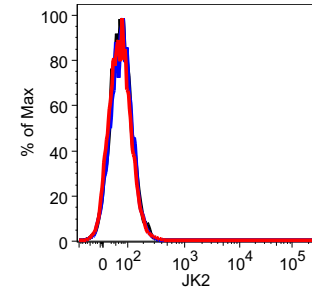

| Sample                     | Mean:PE-A |
|----------------------------|-----------|
| Unfixed_CD15.fcs           | 71.3      |
| Unfixed_IgG1.fcs           | 73.9      |
| Unfixed_Secondary Only.fcs | 73.1      |

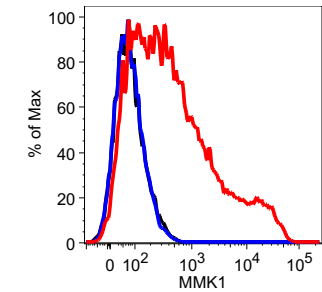

| Sample                     | Mean:PE-A |
|----------------------------|-----------|
| Unfixed_CD15.fcs           | 2513      |
| Unfixed_IgG1.fcs           | 83.6      |
| Unfixed_Secondary only.fcs | 85.6      |

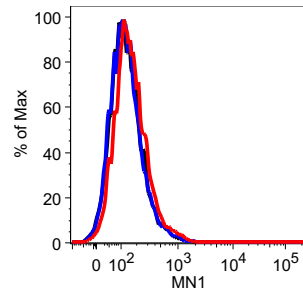

| Sample                     | Mean:PE-A |
|----------------------------|-----------|
| Unfixed_CD15.fcs           | 192       |
| Unfixed_IgG1.fcs           | 153       |
| Unfixed_Secondary only.fcs | 154       |

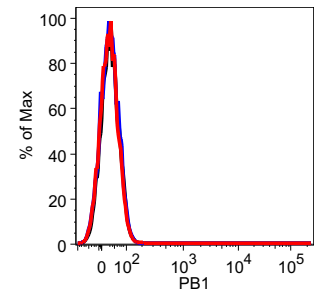

| Sample                     | Mean:PE-A |
|----------------------------|-----------|
| Unfixed_CD15.fcs           | 28.2      |
| Unfixed_IgG1.fcs           | 27.9      |
| Unfixed_Secondary Only.fcs | 29        |

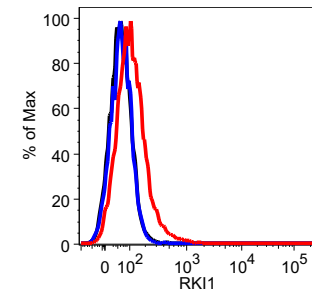

| Sample                     | Mean:PE-A |
|----------------------------|-----------|
| Unfixed_CD15.fcs           | 138       |
| Unfixed_IgG1.fcs           | 63.8      |
| Unfixed_Secondary only.fcs | 63.1      |

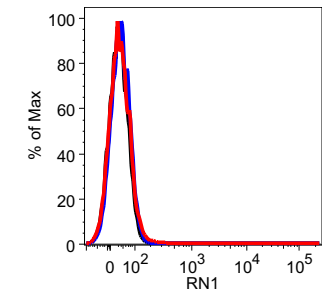

| Sample                     | Mean:PE-A |
|----------------------------|-----------|
| Unfixed_CD15.fcs           | 36.2      |
| Unfixed_IgG1.fcs           | 36.7      |
| Unfixed_Secondary only.fcs | 30.7      |

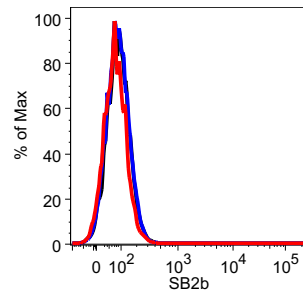

| Sample                     | Mean:PE-A |
|----------------------------|-----------|
| Unfixed_CD15.fcs           | 78.9      |
| Unfixed_IgG1.fcs           | 89.5      |
| Unfixed_Secondary only.fcs | 90.5      |

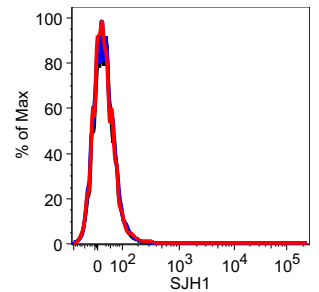

| Sample                     | Mean:PE-A |
|----------------------------|-----------|
| Unfixed_CD15.fcs           | 25.6      |
| Unfixed_IgG1.fcs           | 22.3      |
| Unfixed_Secondary Only.fcs | 21.8      |

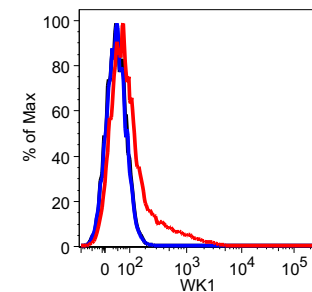

| Sample                     | Mean:PE-A |
|----------------------------|-----------|
| Unfixed_CD15.fcs           | 170       |
| Unfixed_IgG1.fcs           | 42.8      |
| Unfixed_Secondary only.fcs | 43.1      |

# CD44

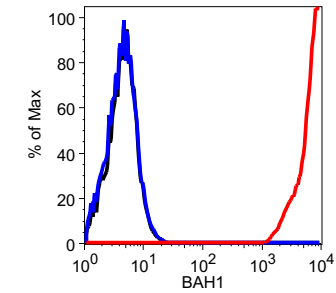

| Sample                           | Mean:PE-A |
|----------------------------------|-----------|
| Unfixed Cells_CD44.fcs           | 7923      |
| Unfixed Cells_IgG1.fcs           | 4.87      |
| Unfixed Cells_Secondary Only.fcs | 4.99      |

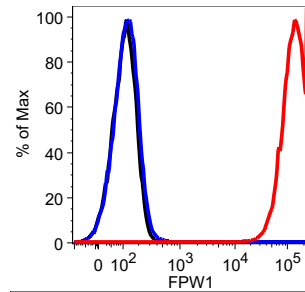

| Sample                           | Mean: PE-A |
|----------------------------------|------------|
| Unfixed Cells_CD44.fcs           | 1.51e5     |
| Unfixed Cells_IgG1.fcs           | 123        |
| Unfixed Cells_Secondary Only.fcs | 113        |

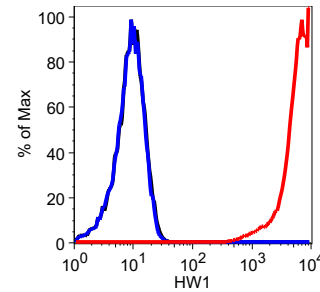

| Sample                           | Mean:PE-A |
|----------------------------------|-----------|
| Unfixed Cells_CD44.fcs           | 6774      |
| Unfixed Cells_IgG1.fcs           | 9.75      |
| Unfixed Cells_Secondary Only.fcs | 9.96      |

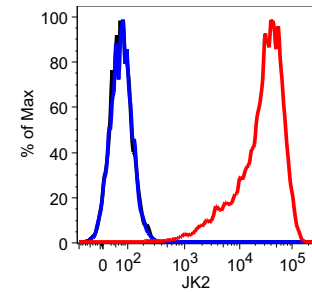

| Sample                     | Mean:PE-A |
|----------------------------|-----------|
| Unfixed_CD44.fcs           | 37588     |
| Unfixed_IgG1.fcs           | 73.9      |
| Unfixed_Secondary Only.fcs | 73.1      |

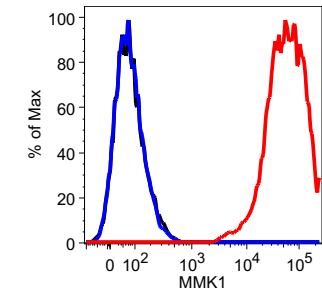

| Sample                     | Mean:PE-A |
|----------------------------|-----------|
| Unfixed_CD44.fcs           | 76428     |
| Unfixed_IgG1.fcs           | 83.6      |
| Unfixed_Secondary only.fcs | 85.6      |

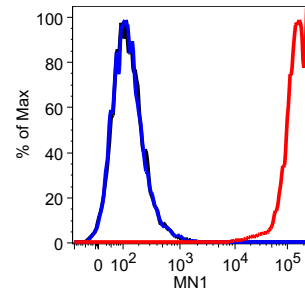

| Sample                     | Mean:PE-A |
|----------------------------|-----------|
| Unfixed_CD44.fcs           | 1.68e5    |
| Unfixed_IgG1.fcs           | 153       |
| Unfixed_Secondary only.fcs | 154       |

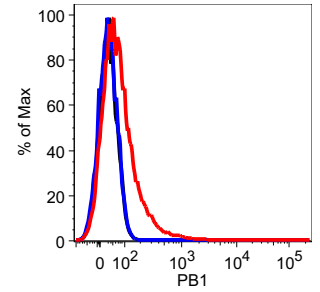

| Sample                     | Mean:PE-A |
|----------------------------|-----------|
| Unfixed_CD44.fcs           | 99.1      |
| Unfixed_IgG1.fcs           | 27.9      |
| Unfixed_Secondary Only.fcs | 29        |

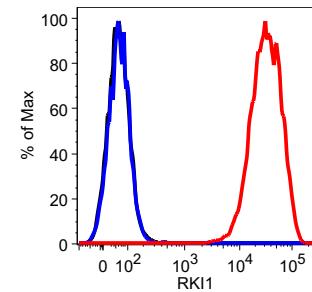

| Sample                     | Mean:PE-A |
|----------------------------|-----------|
| Unfixed_CD44.fcs           | 40186     |
| Unfixed_IgG1.fcs           | 63.8      |
| Unfixed_Secondary only.fcs | 63.1      |

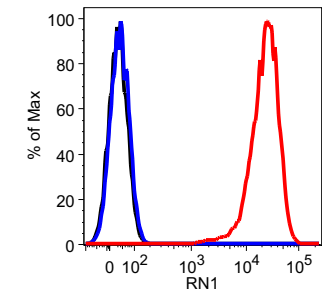

| SampleName                 | Mean:PE-A |
|----------------------------|-----------|
| Unfixed_CD44.fcs           | 27077     |
| Unfixed_IgG1.fcs           | 36.7      |
| Unfixed_Secondary only.fcs | 30.7      |

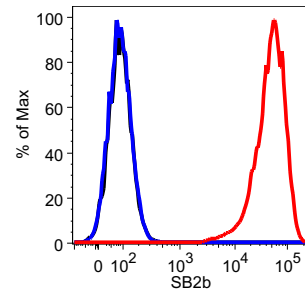

| Sample                     | Mean:PE-A |
|----------------------------|-----------|
| Unfixed_CD44.fcs           | 57808     |
| Unfixed_IgG1.fcs           | 89.5      |
| Unfixed_Secondary only.fcs | 90.5      |

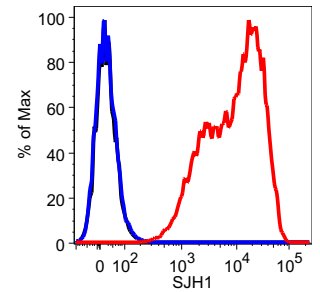

| Sample                     | Mean:PE-A |
|----------------------------|-----------|
| Unfixed_CD44.fcs           | 15563     |
| Unfixed_IgG1.fcs           | 22.3      |
| Unfixed_Secondary Only.fcs | 21.8      |

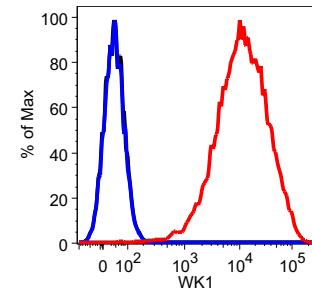

| Sample                     | Mean:PE-A |
|----------------------------|-----------|
| Unfixed_CD44.fcs           | 19550     |
| Unfixed_IgG1.fcs           | 42.8      |
| Unfixed_Secondary only.fcs | 43.1      |

# CD49f

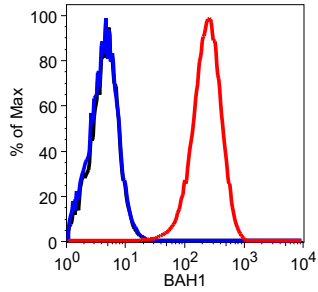

| Sample                           | Mean:PE-A |
|----------------------------------|-----------|
| Unfixed Cells_CD49f.fcs          | 272       |
| Unfixed Cells_IgG1.fcs           | 4.87      |
| Unfixed Cells_Secondary Only.fcs | 4.99      |

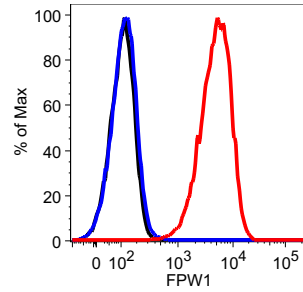

| Sample                           | Mean: PE-A |
|----------------------------------|------------|
| Unfixed Cells_CD49f.fcs          | 5794       |
| Unfixed Cells_IgG1.fcs           | 123        |
| Unfixed Cells_Secondary Only.fcs | 113        |

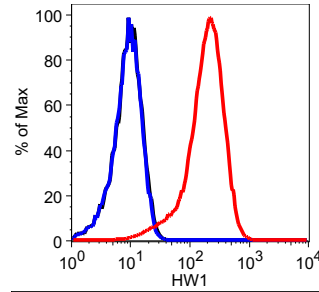

| Sample                           | Mean:PE-A |
|----------------------------------|-----------|
| Unfixed Cells_CD49f.fcs          | 226       |
| Unfixed Cells_IgG1.fcs           | 9.75      |
| Unfixed Cells_Secondary Only.fcs | 9.96      |

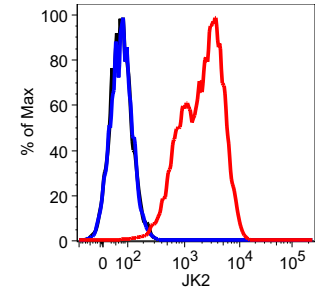

| Sample                     | Mean:PE-A |
|----------------------------|-----------|
| Unfixed_CD49f.fcs          | 2770      |
| Unfixed_IgG1.fcs           | 73.9      |
| Unfixed_Secondary Only.fcs | 73.1      |

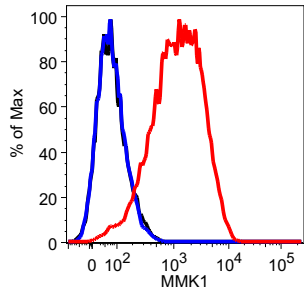

| Sample                     | Mean:PE-A |
|----------------------------|-----------|
| Unfixed_CD49f.fcs          | 1835      |
| Unfixed_IgG1.fcs           | 83.6      |
| Unfixed_Secondary only.fcs | 85.6      |

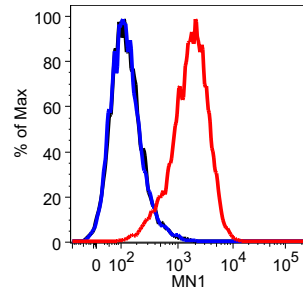

| Sample                     | Mean:PE-A |
|----------------------------|-----------|
| Unfixed_CD49f.fcs          | 2127      |
| Unfixed_IgG1.fcs           | 153       |
| Unfixed_Secondary only.fcs | 154       |

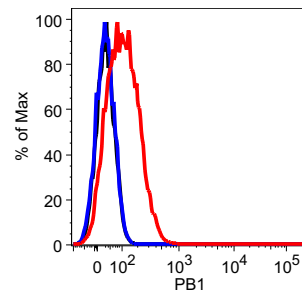

| Sample                     | Mean:PE-A |
|----------------------------|-----------|
| Unfixed_CD49f.fcs          | 119       |
| Unfixed_IgG1.fcs           | 27.9      |
| Unfixed_Secondary Only.fcs | 29        |

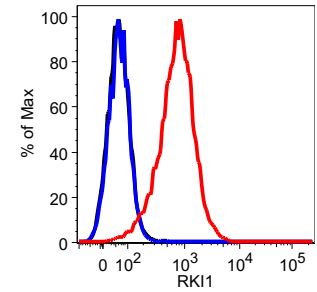

| Sample                     | Mean:PE-A |
|----------------------------|-----------|
| Unfixed_CD49f.fcs          | 906       |
| Unfixed_IgG1.fcs           | 63.8      |
| Unfixed_Secondary only.fcs | 63.1      |

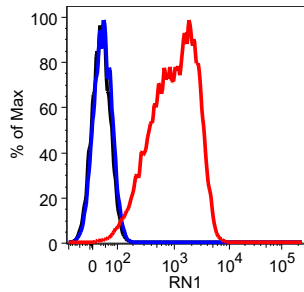

| SampleName                 | Mean:PE-A |
|----------------------------|-----------|
| Unfixed_CD49f.fcs          | 1393      |
| Unfixed_IgG1.fcs           | 36.7      |
| Unfixed_Secondary only.fcs | 30.7      |

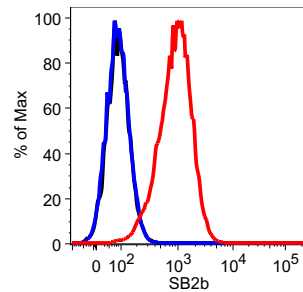

| Sample                     | Mean:PE-A |
|----------------------------|-----------|
| Unfixed_CD49f.fcs          | 1083      |
| Unfixed_IgG1.fcs           | 89.5      |
| Unfixed_Secondary only.fcs | 90.5      |

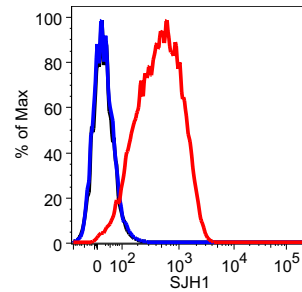

| Sample                     | Mean:PE-A |
|----------------------------|-----------|
| Unfixed_CD49f.fcs          | 627       |
| Unfixed_IgG1.fcs           | 22.3      |
| Unfixed_Secondary Only.fcs | 21.8      |

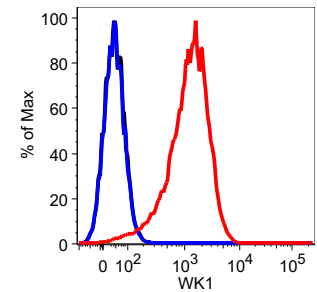

| Sample                     | Mean:PE-A |
|----------------------------|-----------|
| Unfixed_CD49f.fcs          | 1544      |
| Unfixed_IgG1.fcs           | 42.8      |
| Unfixed_Secondary only.fcs | 43.1      |

# EGFR

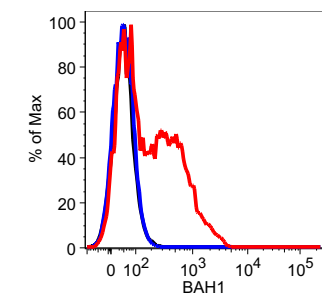

| Sample                     | Mean:PE-A |
|----------------------------|-----------|
| Unfixed_EGFR.fcs           | 334       |
| Unfixed_IgG1.fcs           | 46.8      |
| Unfixed_Secondary Only.fcs | 47.1      |

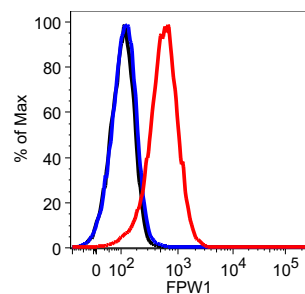

| Sample                           | Mean: PE-A |
|----------------------------------|------------|
| Unfixed Cells_EGFR.fcs           | 645        |
| Unfixed Cells_IgG1.fcs           | 123        |
| Unfixed Cells_Secondary Only.fcs | 113        |

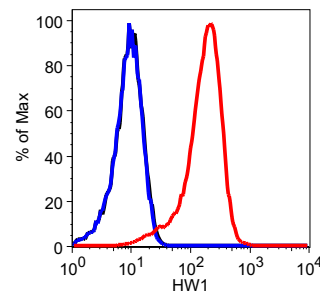

| Sample                           | Mean:PE-A |
|----------------------------------|-----------|
| Unfixed Cells_EGFR.fcs           | 203       |
| Unfixed Cells_IgG1.fcs           | 9.75      |
| Unfixed Cells_Secondary Only.fcs | 9.96      |

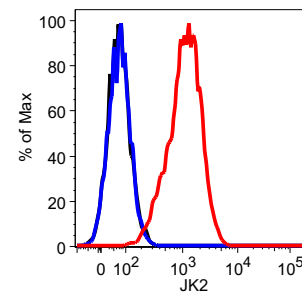

| Sample                     | Mean:PE-A |
|----------------------------|-----------|
| Unfixed_EGFR.fcs           | 1319      |
| Unfixed_IgG1.fcs           | 73.9      |
| Unfixed_Secondary Only.fcs | 73.1      |

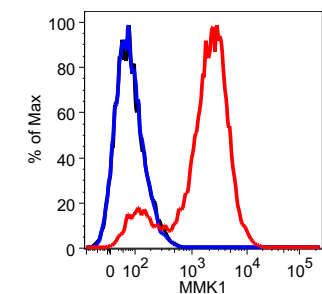

| Sample                     | Mean:PE-A |
|----------------------------|-----------|
| Unfixed_EGFR.fcs           | 2465      |
| Unfixed_IgG1.fcs           | 83.6      |
| Unfixed_Secondary only.fcs | 85.6      |

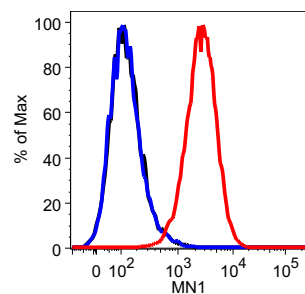

| Sample                     | Mean:PE-A |
|----------------------------|-----------|
| Unfixed_EGFR.fcs           | 3179      |
| Unfixed_IgG1.fcs           | 153       |
| Unfixed_Secondary only.fcs | 154       |

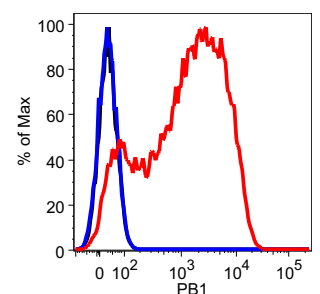

| Sample                     | Mean:PE-A |
|----------------------------|-----------|
| Unfixed_EGFR.fcs           | 2899      |
| Unfixed_IgG1.fcs           | 27.9      |
| Unfixed_Secondary Only.fcs | 29        |

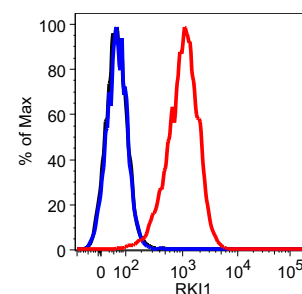

| Sample                     | Mean:PE-A |
|----------------------------|-----------|
| Unfixed_EGFR.fcs           | 1207      |
| Unfixed_IgG1.fcs           | 63.8      |
| Unfixed_Secondary only.fcs | 63.1      |

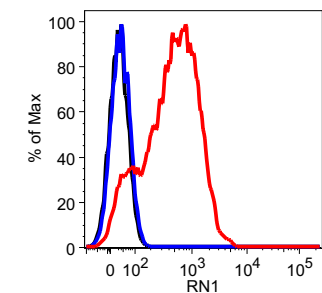

| SampleName                 | Mean:PE-A |
|----------------------------|-----------|
| Unfixed_EGFR.fcs           | 679       |
| Unfixed_IgG1.fcs           | 36.7      |
| Unfixed_Secondary only.fcs | 30.7      |

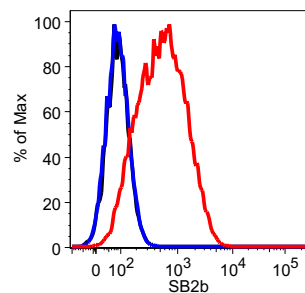

| Sample                     | Mean:PE-A |
|----------------------------|-----------|
| Unfixed_EGFR.fcs           | 800       |
| Unfixed_IgG1.fcs           | 89.5      |
| Unfixed_Secondary only.fcs | 90.5      |

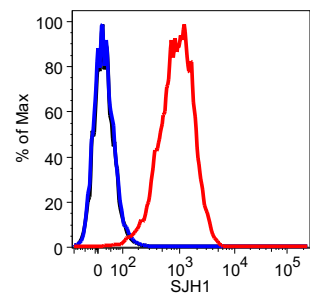

| Sample                     | Mean:PE-A |
|----------------------------|-----------|
| Unfixed_EGFR.fcs           | 1091      |
| Unfixed_IgG1.fcs           | 22.3      |
| Unfixed_Secondary Only.fcs | 21.8      |

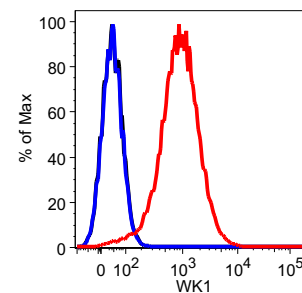

| Sample                     | Mean:PE-A |
|----------------------------|-----------|
| Unfixed_EGFR.fcs           | 1181      |
| Unfixed_IgG1.fcs           | 42.8      |
| Unfixed_Secondary only.fcs | 43.1      |

# EGFRvIII

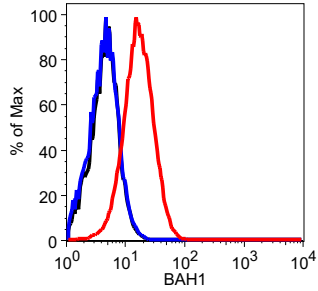

| Sample                           | Mean:PE-A |
|----------------------------------|-----------|
| Unfixed Cells_EGFRvIII.fcs       | 19.2      |
| Unfixed Cells_IgG1.fcs           | 4.87      |
| Unfixed Cells_Secondary Only.fcs | 4.99      |

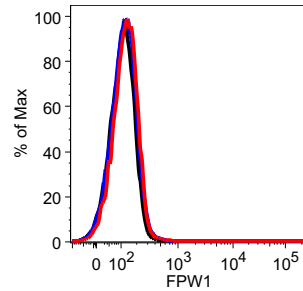

| Sample                           | Mean: PE-A |
|----------------------------------|------------|
| Unfixed Cells_EGFRvIII.fcs       | 137        |
| Unfixed Cells_IgG1.fcs           | 123        |
| Unfixed Cells_Secondary Only.fcs | 113        |

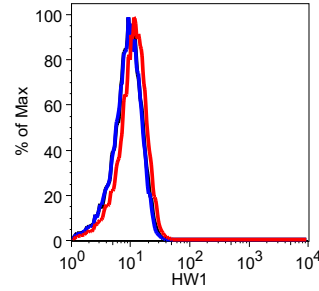

| Sample                           | Mean:PE-A |
|----------------------------------|-----------|
| Unfixed Cells_EGFRvIII.fcs       | 12.1      |
| Unfixed Cells_IgG1.fcs           | 9.75      |
| Unfixed Cells_Secondary Only.fcs | 9.96      |

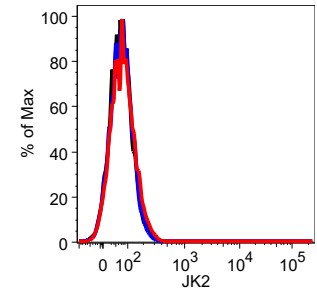

| Sample                           | Mean:PE-A |
|----------------------------------|-----------|
| Unfixed Cells_EGFRvIII.fcs       | 81.3      |
| Unfixed Cells_IgG1.fcs           | 73.9      |
| Unfixed Cells_Secondary Only.fcs | 73.1      |

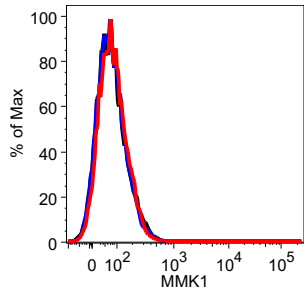

| Sample                           | Mean:PE-A |
|----------------------------------|-----------|
| Unfixed Cells_EGFRvIII.fcs       | 88.5      |
| Unfixed Cells_IgG1.fcs           | 83.6      |
| Unfixed Cells_Secondary only.fcs | 85.6      |

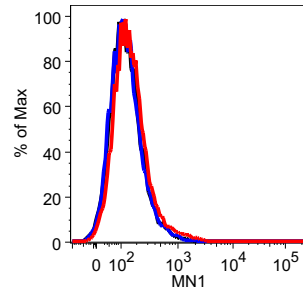

| Sample                           | Mean:PE-A |
|----------------------------------|-----------|
| Unfixed Cells_EGFRvIII.fcs       | 201       |
| Unfixed Cells_IgG1.fcs           | 153       |
| Unfixed Cells_Secondary only.fcs | 154       |

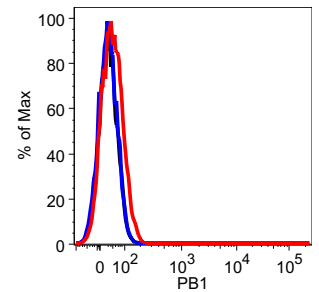

| Sample                           | Mean:PE-A |
|----------------------------------|-----------|
| Unfixed Cells_EGFRvIII.fcs       | 46.3      |
| Unfixed Cells_IgG1.fcs           | 27.9      |
| Unfixed Cells_Secondary Only.fcs | 29        |

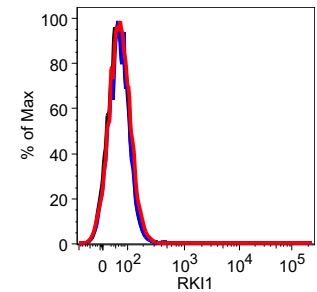

| Sample                           | Mean:PE-A |
|----------------------------------|-----------|
| Unfixed Cells_EGFRvIII.fcs       | 69.1      |
| Unfixed Cells_IgG1.fcs           | 63.8      |
| Unfixed Cells_Secondary only.fcs | 63.1      |

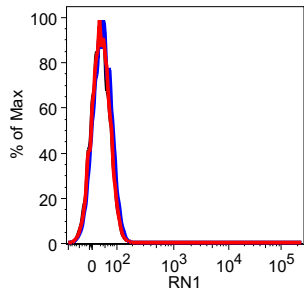

| SampleName                       | Mean:PE-A |
|----------------------------------|-----------|
| Unfixed Cells_EGFRvIII.fcs       | 30.6      |
| Unfixed Cells_IgG1.fcs           | 36.7      |
| Unfixed Cells_Secondary only.fcs | 30.7      |

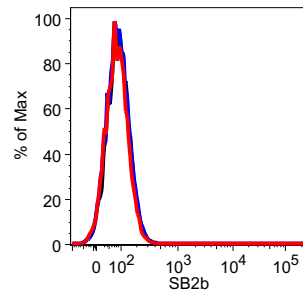

| Sample                           | Mean:PE-A |
|----------------------------------|-----------|
| Unfixed Cells_EGFRvIII.fcs       | 84.7      |
| Unfixed Cells_IgG1.fcs           | 89.5      |
| Unfixed Cells_Secondary only.fcs | 90.5      |

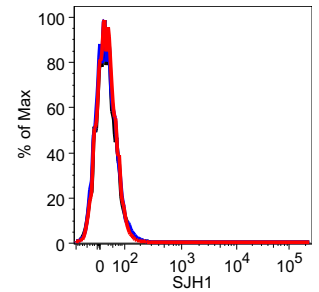

| Sample                           | Mean:PE-A |
|----------------------------------|-----------|
| Unfixed Cells_EGFRvIII.fcs       | 22.2      |
| Unfixed Cells_IgG1.fcs           | 22.3      |
| Unfixed Cells_Secondary Only.fcs | 21.8      |

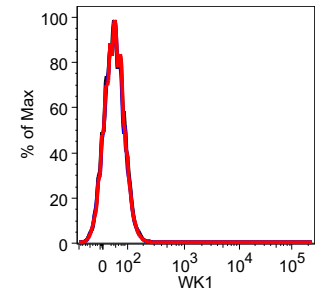

| Sample                           | Mean:PE-A |
|----------------------------------|-----------|
| Unfixed Cells_EGFRvIII.fcs       | 42.8      |
| Unfixed Cells_IgG1.fcs           | 42.8      |
| Unfixed Cells_Secondary only.fcs | 43.1      |

# PDGFRa

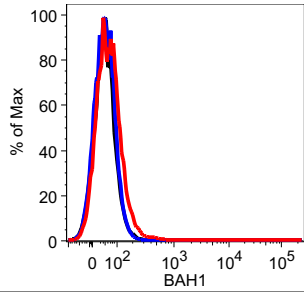

| Sample                     | Mean:PE-A |
|----------------------------|-----------|
| Unfixed_PDGFRA.fcs         | 69.3      |
| Unfixed_IgG1.fcs           | 46.8      |
| Unfixed_Secondary Only.fcs | 47.1      |

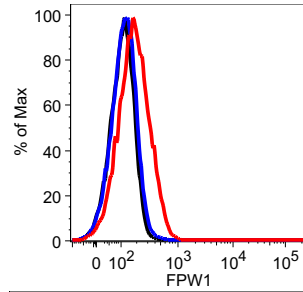

| Sample                           | Mean: PE-A |
|----------------------------------|------------|
| Unfixed_Cells_PDGFRA.fcs         | 203        |
| Unfixed_Cells_IgG1.fcs           | 123        |
| Unfixed_Cells_Secondary Only.fcs | 113        |

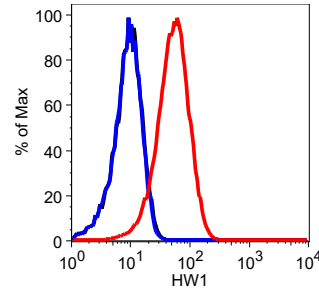

| Sample                           | Mean:PE-A |
|----------------------------------|-----------|
| Unfixed_Cells_PDGFRA.fcs         | 61.2      |
| Unfixed_Cells_IgG1.fcs           | 9.75      |
| Unfixed_Cells_Secondary Only.fcs | 9.96      |

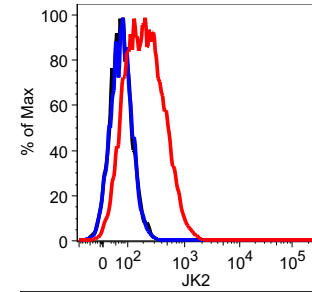

| Sample                     | Mean:PE-A |
|----------------------------|-----------|
| Unfixed_PDGFRA.fcs         | 262       |
| Unfixed_IgG1.fcs           | 73.9      |
| Unfixed_Secondary Only.fcs | 73.1      |

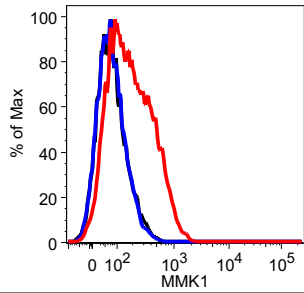

| Sample                     | Mean:PE-A |
|----------------------------|-----------|
| Unfixed_PDGFRA.fcs         | 250       |
| Unfixed_IgG1.fcs           | 83.6      |
| Unfixed_Secondary only.fcs | 85.6      |

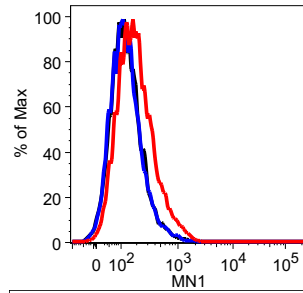

| Sample                     | Mean:PE-A |
|----------------------------|-----------|
| Unfixed_PDGFRA.fcs         | 243       |
| Unfixed_IgG1.fcs           | 153       |
| Unfixed_Secondary only.fcs | 154       |

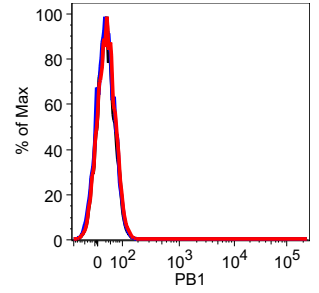

| Sample                     | Mean:PE-A |
|----------------------------|-----------|
| Unfixed_PDGFRA.fcs         | 31.3      |
| Unfixed_IgG1.fcs           | 27.9      |
| Unfixed_Secondary Only.fcs | 29        |

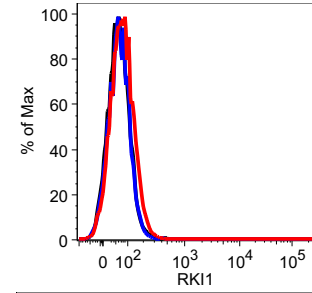

| Sample                     | Mean:PE-A |
|----------------------------|-----------|
| Unfixed_PDGFRA_01.fcs      | 79.2      |
| Unfixed_IgG1.fcs           | 63.8      |
| Unfixed_Secondary only.fcs | 63.1      |

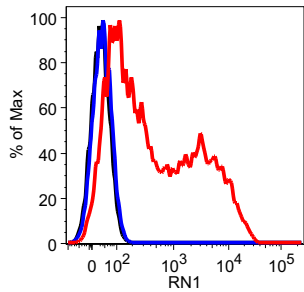

| SampleName                 | Mean:PE-A |
|----------------------------|-----------|
| Unfixed_PDGFRA.fcs         | 2038      |
| Unfixed_IgG1.fcs           | 36.7      |
| Unfixed_Secondary only.fcs | 30.7      |

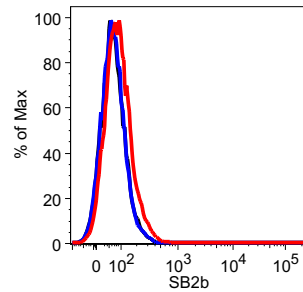

| Sample                  | Mean:PE-A |
|-------------------------|-----------|
| SB2b_PDGFRA.fcs         | 95.3      |
| SB2b_IgG1.fcs           | 68.2      |
| SB2b_Secondary Only.fcs | 68.8      |

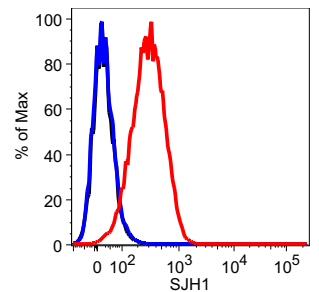

| Sample                     | Mean:PE-A |
|----------------------------|-----------|
| Unfixed_PDGFRA.fcs         | 351       |
| Unfixed_IgG1.fcs           | 22.3      |
| Unfixed_Secondary Only.fcs | 21.8      |

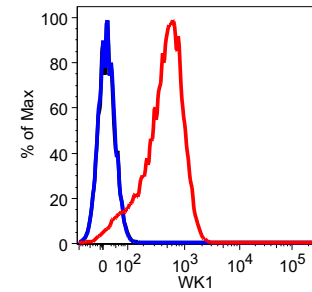

| Sample                 | Mean:PE-A |
|------------------------|-----------|
| WK1_PDGFRA.fcs         | 538       |
| WK1_IgG1.fcs           | 11.9      |
| WK1_Secondary Only.fcs | 12.2      |



# EphA2

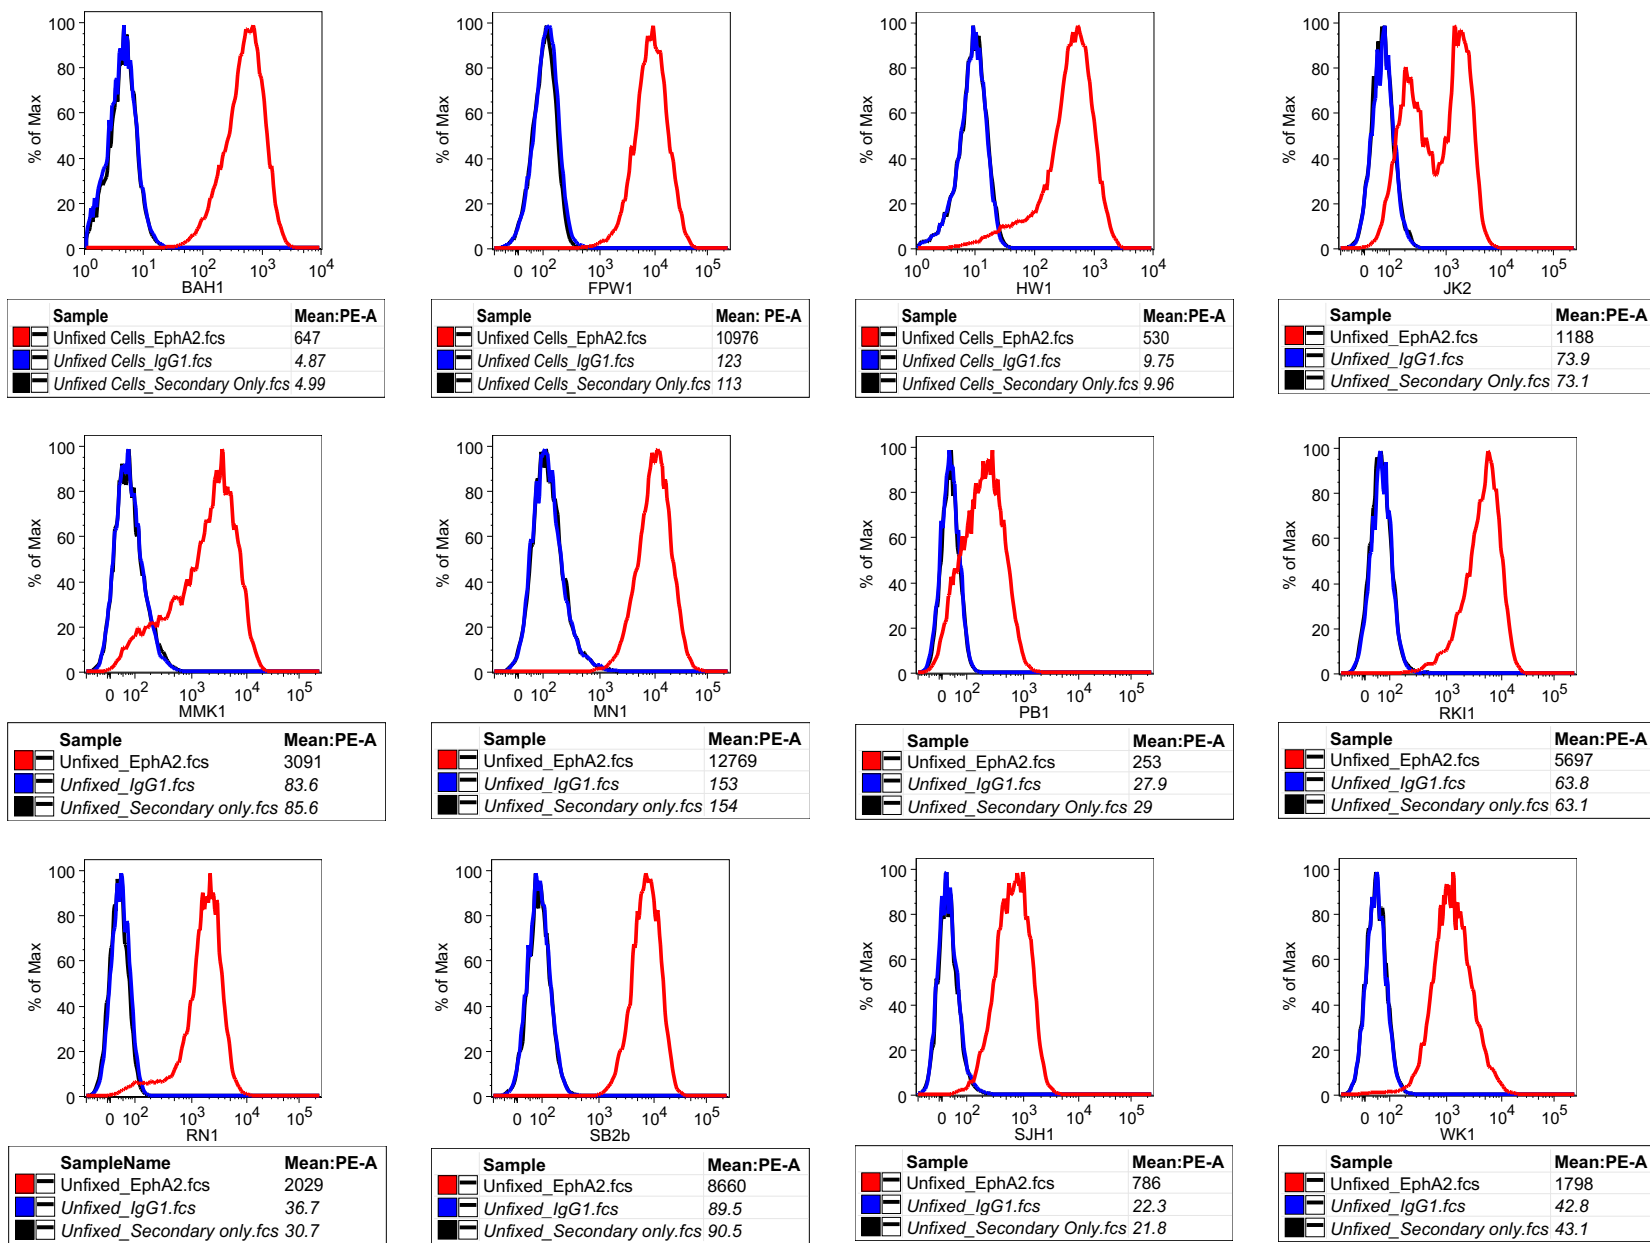

# EphA3

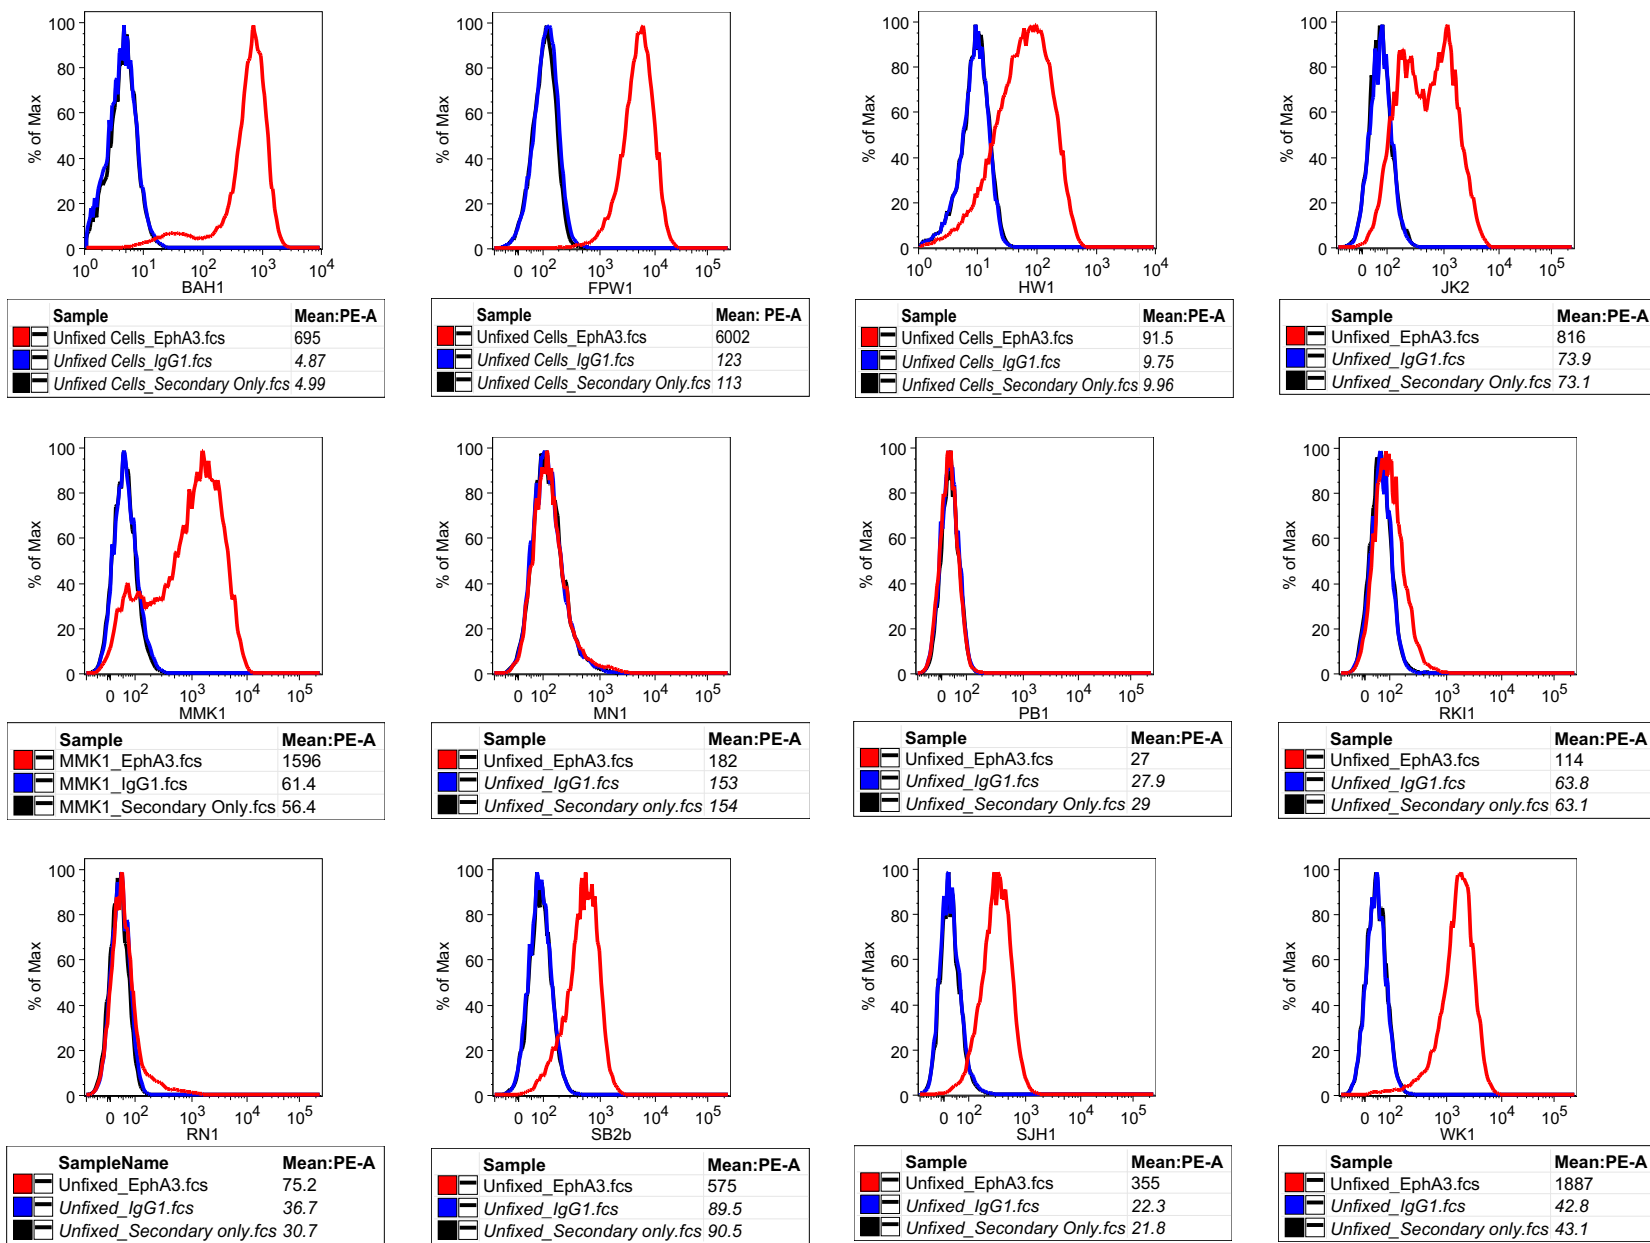

# EphA4

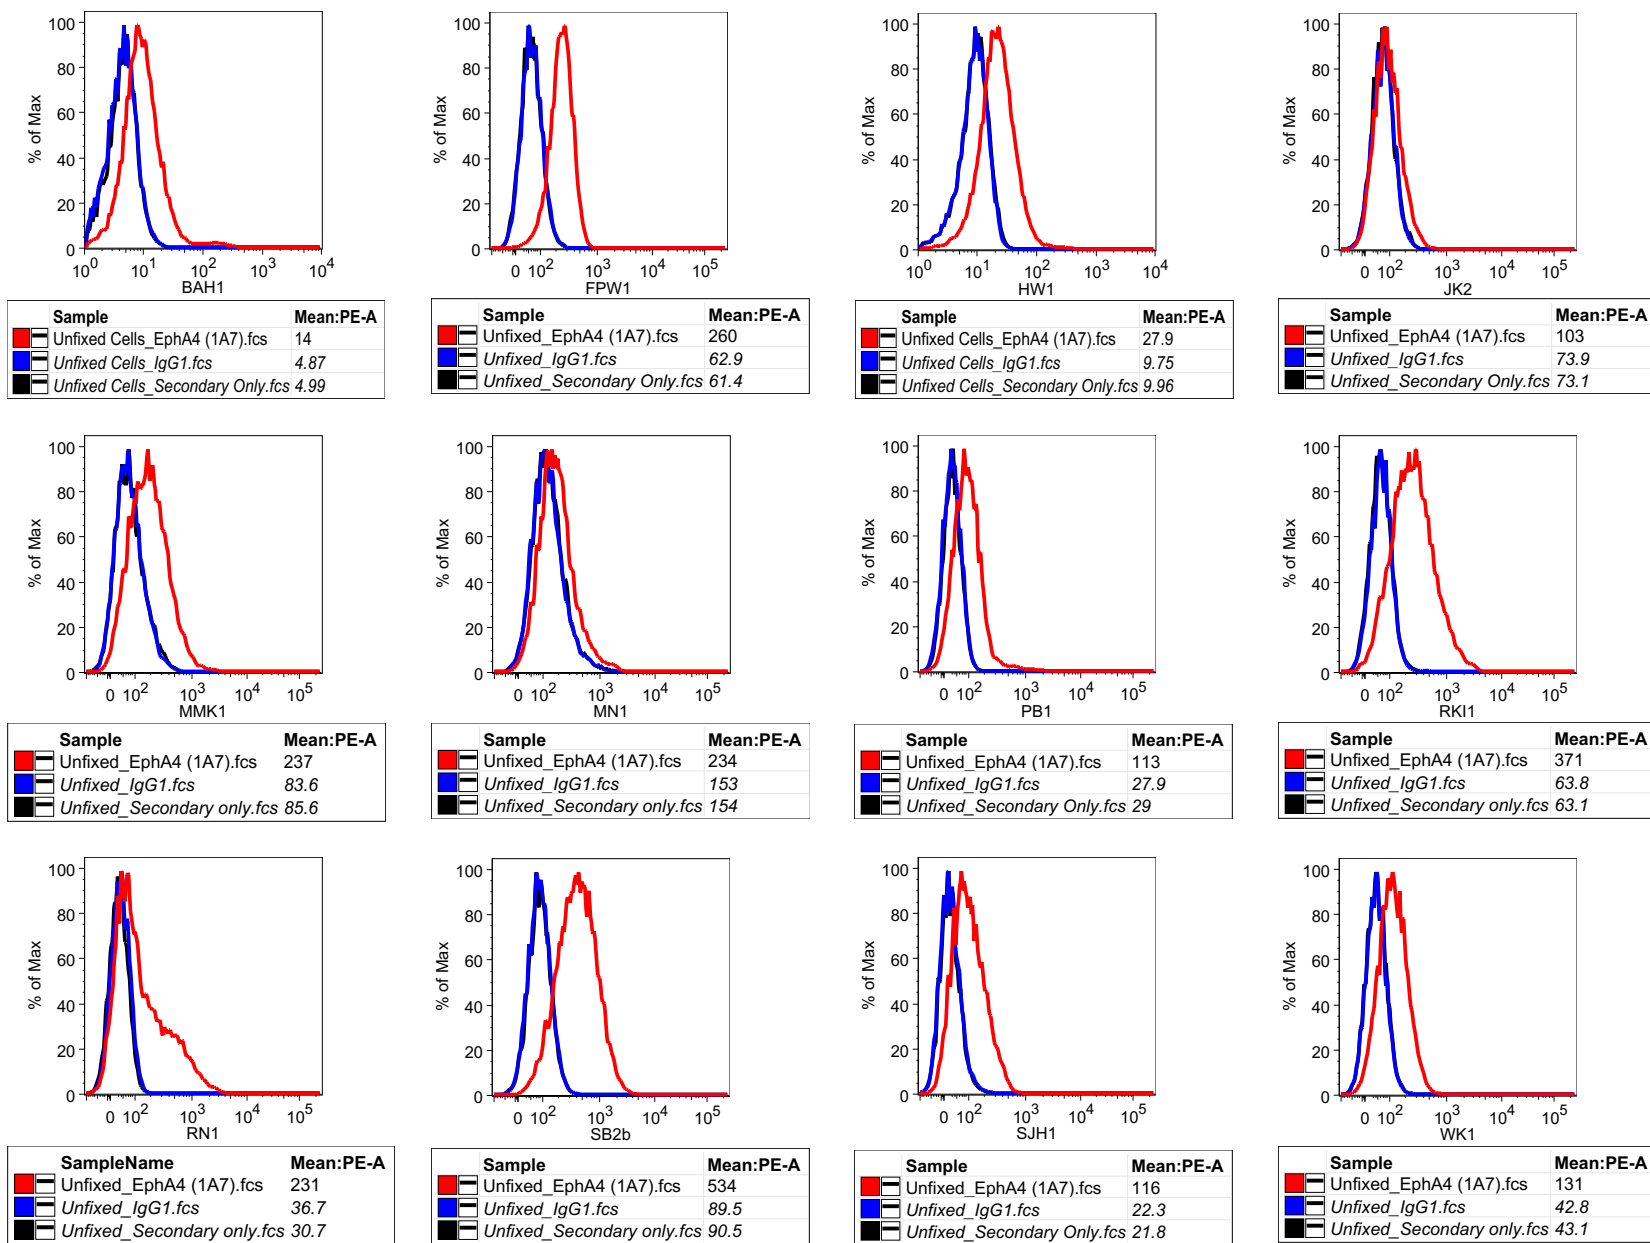

# FGFR1

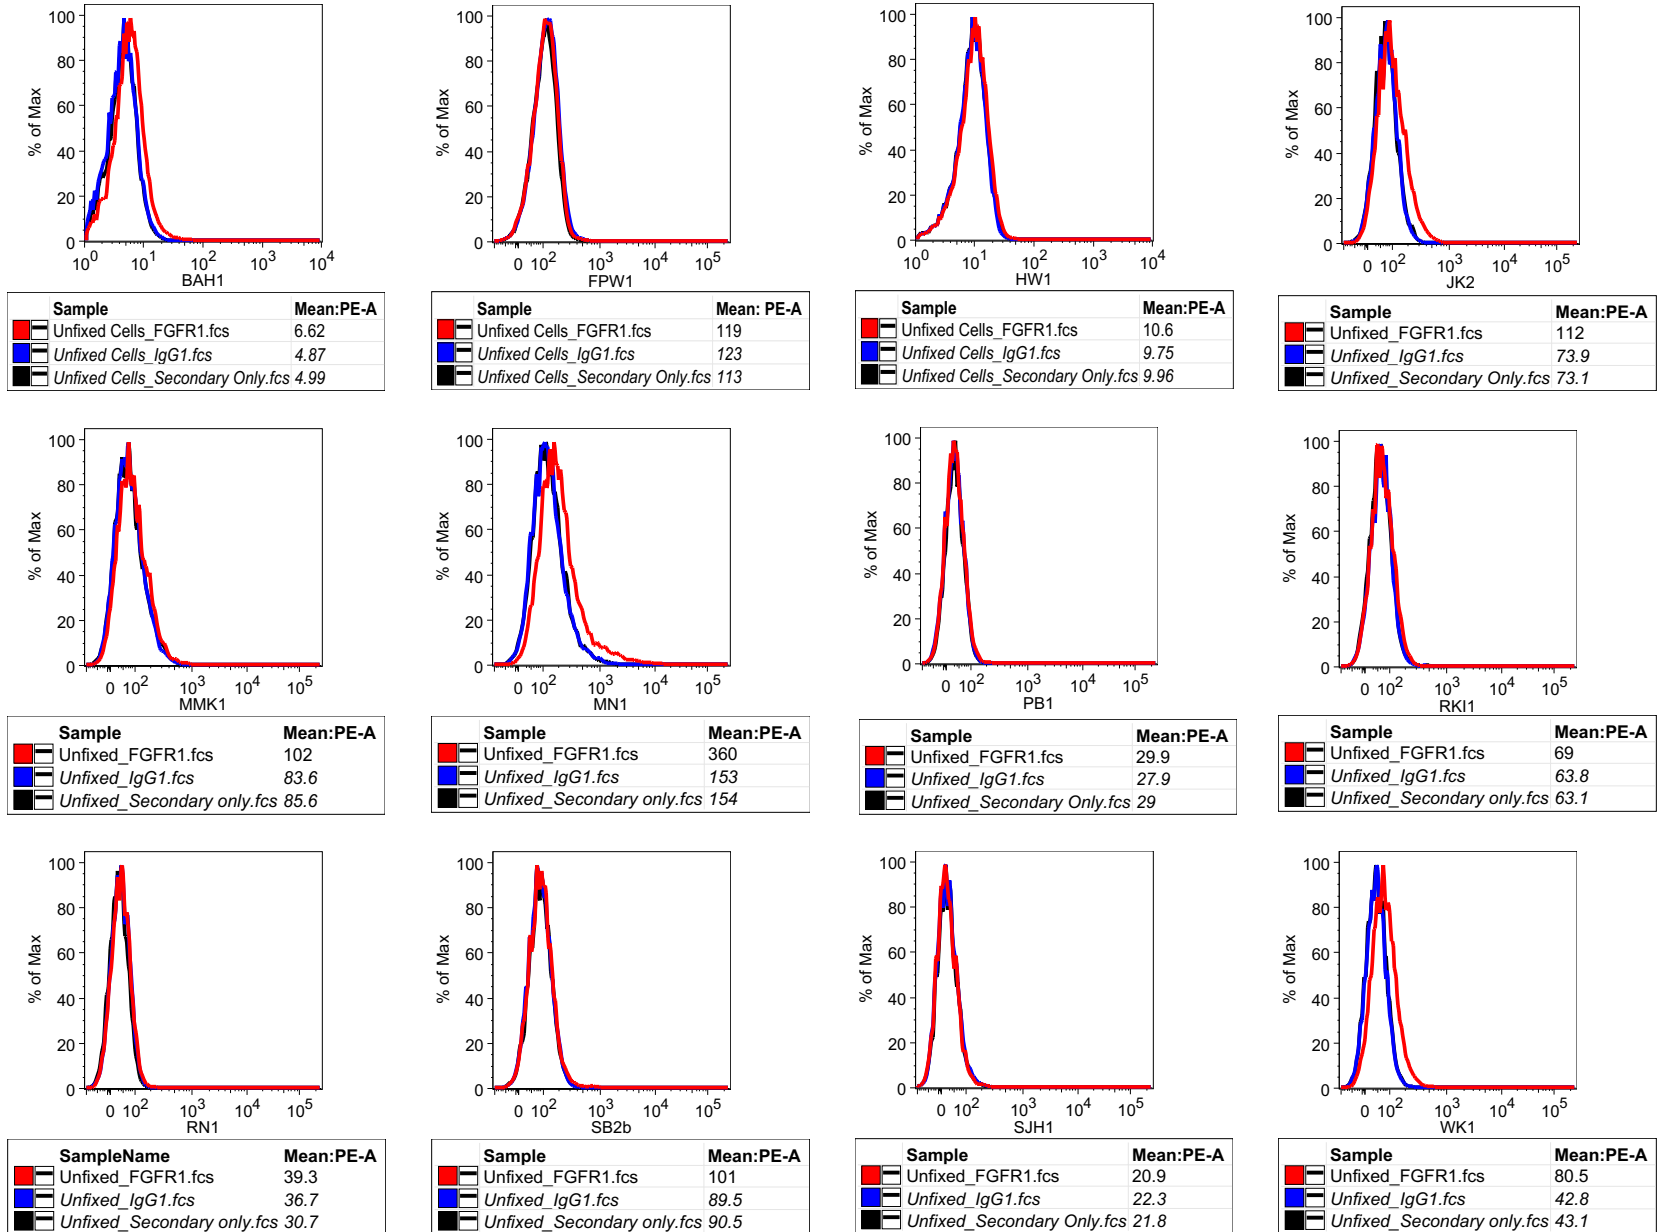

# FGFR2

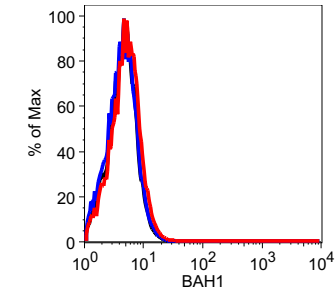

| Sample                           | Mean:PE-A |
|----------------------------------|-----------|
| Unfixed Cells_FGFR2.fcs          | 5.6       |
| Unfixed Cells_IgG1.fcs           | 4.87      |
| Unfixed Cells_Secondary Only.fcs | 4.99      |

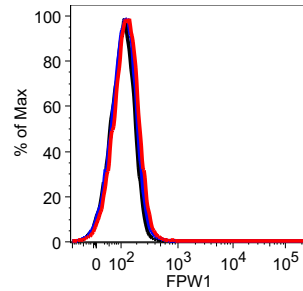

| Sample                           | Mean: PE-A |
|----------------------------------|------------|
| Unfixed Cells_FGFR2.fcs          | 138        |
| Unfixed Cells_IgG1.fcs           | 123        |
| Unfixed Cells_Secondary Only.fcs | 113        |

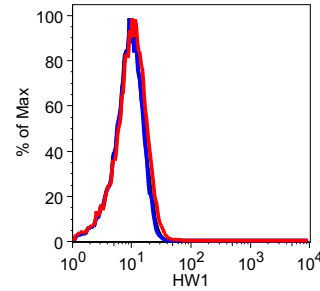

| Sample                           | Mean:PE-A |
|----------------------------------|-----------|
| Unfixed Cells_FGFR2.fcs          | 11.3      |
| Unfixed Cells_IgG1.fcs           | 9.75      |
| Unfixed Cells_Secondary Only.fcs | 9.96      |

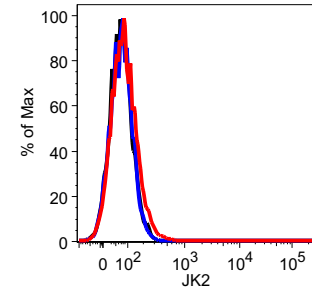

| Sample                           | Mean:PE-A |
|----------------------------------|-----------|
| Unfixed Cells_FGFR2.fcs          | 93.3      |
| Unfixed Cells_IgG1.fcs           | 73.9      |
| Unfixed Cells_Secondary Only.fcs | 73.1      |

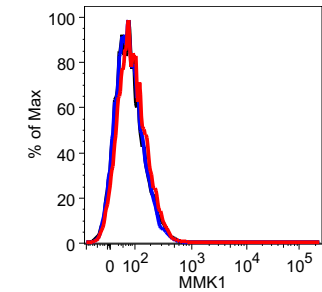

| Sample                           | Mean:PE-A |
|----------------------------------|-----------|
| Unfixed Cells_FGFR2.fcs          | 99.2      |
| Unfixed Cells_IgG1.fcs           | 83.6      |
| Unfixed Cells_Secondary only.fcs | 85.6      |

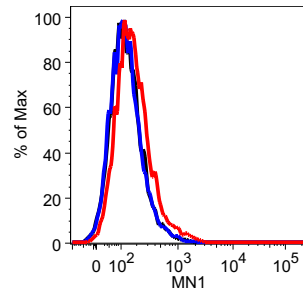

| Sample                           | Mean:PE-A |
|----------------------------------|-----------|
| Unfixed Cells_FGFR2.fcs          | 234       |
| Unfixed Cells_IgG1.fcs           | 153       |
| Unfixed Cells_Secondary only.fcs | 154       |

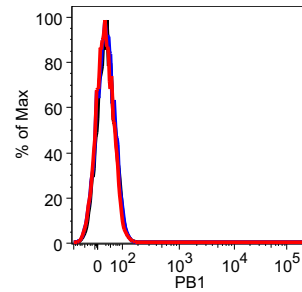

| Sample                           | Mean:PE-A |
|----------------------------------|-----------|
| Unfixed Cells_FGFR2.fcs          | 25.7      |
| Unfixed Cells_IgG1.fcs           | 27.9      |
| Unfixed Cells_Secondary Only.fcs | 29        |

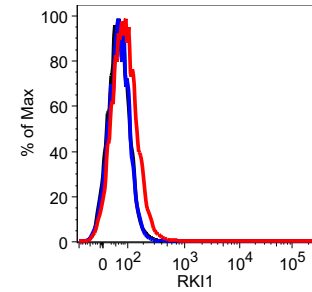

| Sample                           | Mean:PE-A |
|----------------------------------|-----------|
| Unfixed Cells_FGFR2.fcs          | 92.6      |
| Unfixed Cells_IgG1.fcs           | 63.8      |
| Unfixed Cells_Secondary only.fcs | 63.1      |

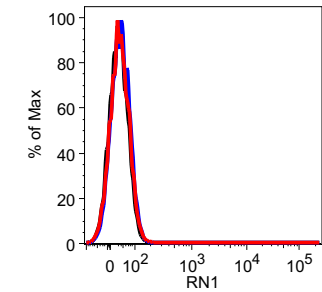

| Sample                           | Mean:PE-A |
|----------------------------------|-----------|
| Unfixed Cells_FGFR2.fcs          | 34.6      |
| Unfixed Cells_IgG1.fcs           | 36.7      |
| Unfixed Cells_Secondary only.fcs | 30.7      |

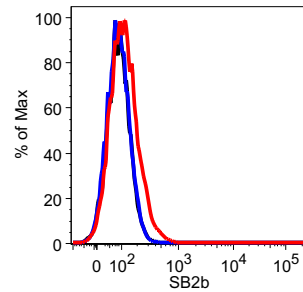

| Sample                           | Mean:PE-A |
|----------------------------------|-----------|
| Unfixed Cells_FGFR2.fcs          | 129       |
| Unfixed Cells_IgG1.fcs           | 89.5      |
| Unfixed Cells_Secondary only.fcs | 90.5      |

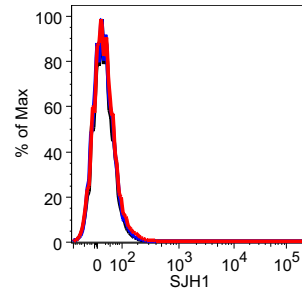

| Sample                           | Mean:PE-A |
|----------------------------------|-----------|
| Unfixed Cells_FGFR2.fcs          | 26.7      |
| Unfixed Cells_IgG1.fcs           | 22.3      |
| Unfixed Cells_Secondary Only.fcs | 21.8      |

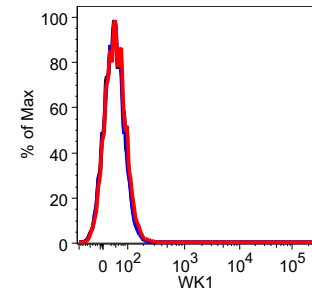

| Sample                           | Mean:PE-A |
|----------------------------------|-----------|
| Unfixed Cells_FGFR2.fcs          | 48.1      |
| Unfixed Cells_IgG1.fcs           | 42.8      |
| Unfixed Cells_Secondary only.fcs | 43.1      |

# FGFR3

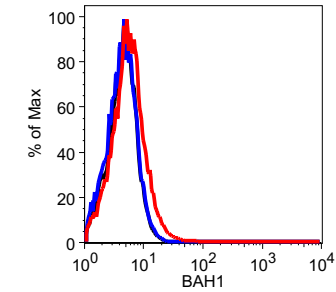

| Sample                           | Mean:PE-A |
|----------------------------------|-----------|
| Unfixed Cells_FGFR3.fcs          | 6.8       |
| Unfixed Cells_IgG1.fcs           | 4.87      |
| Unfixed Cells_Secondary Only.fcs | 4.99      |

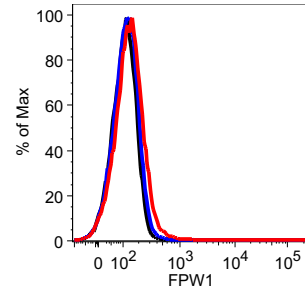

| Sample                           | Mean: PE-A |
|----------------------------------|------------|
| Unfixed Cells_FGFR3.fcs          | 158        |
| Unfixed Cells_IgG1.fcs           | 123        |
| Unfixed Cells_Secondary Only.fcs | 113        |

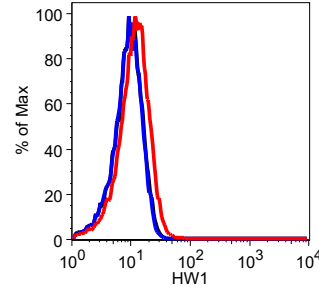

| Sample                           | Mean:PE-A |
|----------------------------------|-----------|
| Unfixed Cells_FGFR3.fcs          | 13.3      |
| Unfixed Cells_IgG1.fcs           | 9.75      |
| Unfixed Cells_Secondary Only.fcs | 9.96      |

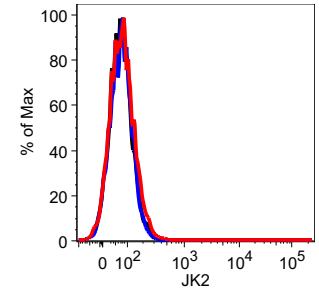

| Sample                           | Mean:PE-A |
|----------------------------------|-----------|
| Unfixed Cells_FGFR3.fcs          | 82.7      |
| Unfixed Cells_IgG1.fcs           | 73.9      |
| Unfixed Cells_Secondary Only.fcs | 73.1      |

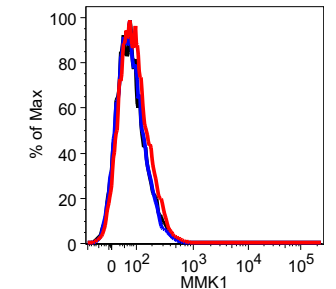

| Sample                           | Mean:PE-A |
|----------------------------------|-----------|
| Unfixed Cells_FGFR3.fcs          | 103       |
| Unfixed Cells_IgG1.fcs           | 83.6      |
| Unfixed Cells_Secondary only.fcs | 85.6      |

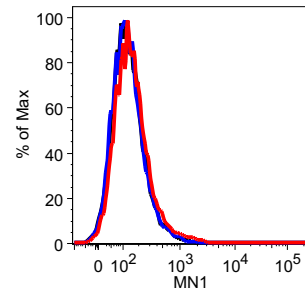

| Sample                           | Mean:PE-A |
|----------------------------------|-----------|
| Unfixed Cells_FGFR3.fcs          | 203       |
| Unfixed Cells_IgG1.fcs           | 153       |
| Unfixed Cells_Secondary only.fcs | 154       |

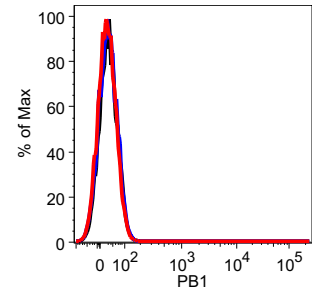

| Sample                           | Mean:PE-A |
|----------------------------------|-----------|
| Unfixed Cells_FGFR3.fcs          | 25.1      |
| Unfixed Cells_IgG1.fcs           | 27.9      |
| Unfixed Cells_Secondary Only.fcs | 29        |

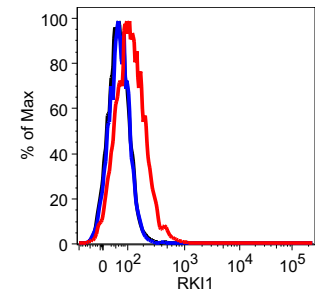

| Sample                           | Mean:PE-A |
|----------------------------------|-----------|
| Unfixed Cells_FGFR3_01.fcs       | 132       |
| Unfixed Cells_IgG1.fcs           | 63.8      |
| Unfixed Cells_Secondary only.fcs | 63.1      |

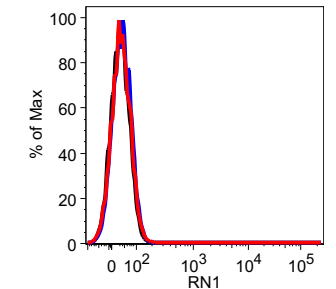

| SampleName                       | Mean:PE-A |
|----------------------------------|-----------|
| Unfixed Cells_FGFR3.fcs          | 34.6      |
| Unfixed Cells_IgG1.fcs           | 36.7      |
| Unfixed Cells_Secondary only.fcs | 30.7      |

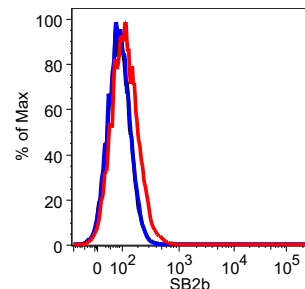

| Sample                           | Mean:PE-A |
|----------------------------------|-----------|
| Unfixed Cells_FGFR3.fcs          | 126       |
| Unfixed Cells_IgG1.fcs           | 89.5      |
| Unfixed Cells_Secondary only.fcs | 90.5      |

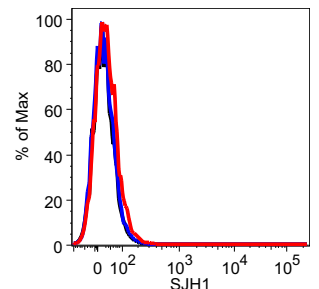

| Sample                           | Mean:PE-A |
|----------------------------------|-----------|
| Unfixed Cells_FGFR3.fcs          | 33.8      |
| Unfixed Cells_IgG1.fcs           | 22.3      |
| Unfixed Cells_Secondary Only.fcs | 21.8      |

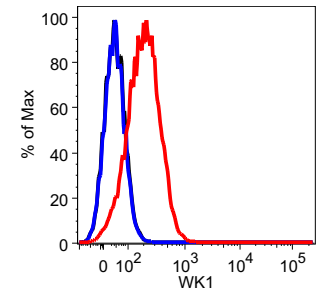

| Sample                           | Mean:PE-A |
|----------------------------------|-----------|
| Unfixed Cells_FGFR3.fcs          | 228       |
| Unfixed Cells_IgG1.fcs           | 42.8      |
| Unfixed Cells_Secondary only.fcs | 43.1      |

# c-MET

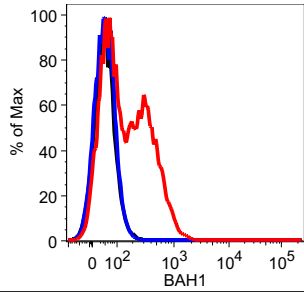

| Sample                     | Mean:PE-A |
|----------------------------|-----------|
| Unfixed_c-MET.fcs          | 216       |
| Unfixed_IgG1.fcs           | 46.8      |
| Unfixed_Secondary Only.fcs | 47.1      |

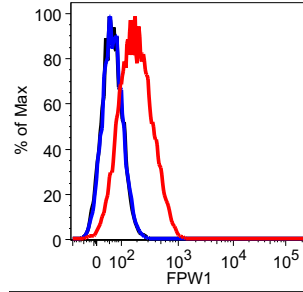

| Sample                     | Mean:PE-A |
|----------------------------|-----------|
| Unfixed_c-MET.fcs          | 223       |
| Unfixed_IgG1.fcs           | 62.9      |
| Unfixed_Secondary Only.fcs | 61.4      |

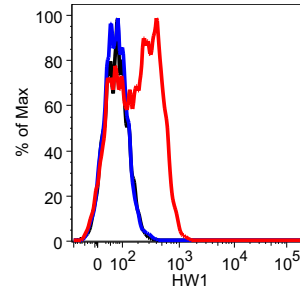

| Sample                     | Mean:PE-A |
|----------------------------|-----------|
| Unfixed_c-MET.fcs          | 242       |
| Unfixed_IgG1.fcs           | 73.6      |
| Unfixed_Secondary Only.fcs | 75.1      |

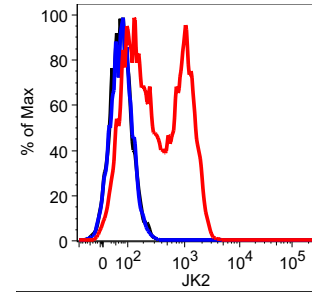

| Sample                     | Mean:PE-A |
|----------------------------|-----------|
| Unfixed_c-MET.fcs          | 543       |
| Unfixed_IgG1.fcs           | 73.9      |
| Unfixed_Secondary Only.fcs | 73.1      |

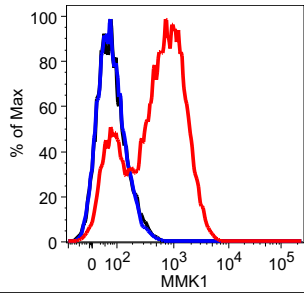

| Sample                     | Mean:PE-A |
|----------------------------|-----------|
| Unfixed_c-MET.fcs          | 791       |
| Unfixed_IgG1.fcs           | 83.6      |
| Unfixed_Secondary only.fcs | 85.6      |

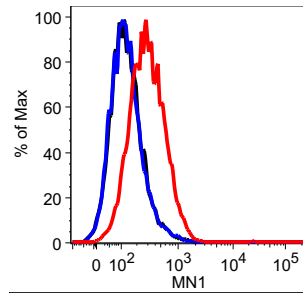

| Sample                     | Mean:PE-A |
|----------------------------|-----------|
| Unfixed_c-MET.fcs          | 404       |
| Unfixed_IgG1.fcs           | 153       |
| Unfixed_Secondary only.fcs | 154       |

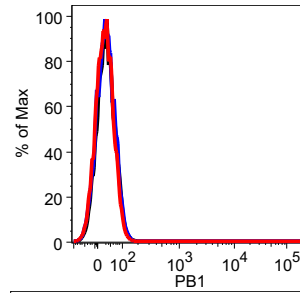

| Sample                     | Mean:PE-A |
|----------------------------|-----------|
| Unfixed_c-MET.fcs          | 24.5      |
| Unfixed_IgG1.fcs           | 27.9      |
| Unfixed_Secondary Only.fcs | 29        |

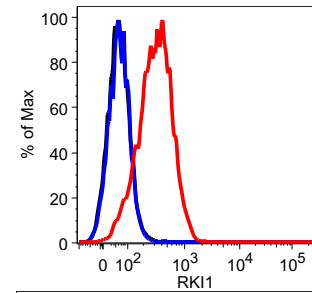

| Sample                     | Mean:PE-A |
|----------------------------|-----------|
| Unfixed_c-MET.fcs          | 375       |
| Unfixed_IgG1.fcs           | 63.8      |
| Unfixed_Secondary only.fcs | 63.1      |

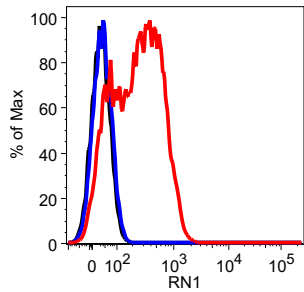

| SampleName                 | Mean:PE-A |
|----------------------------|-----------|
| Unfixed_c-MET.fcs          | 327       |
| Unfixed_IgG1.fcs           | 36.7      |
| Unfixed_Secondary only.fcs | 30.7      |

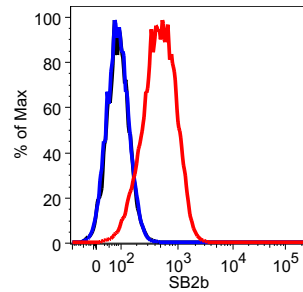

| Sample                     | Mean:PE-A |
|----------------------------|-----------|
| Unfixed_c-MET.fcs          | 573       |
| Unfixed_IgG1.fcs           | 89.5      |
| Unfixed_Secondary only.fcs | 90.5      |

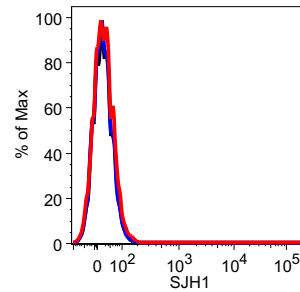

| Sample                     | Mean:PE-A |
|----------------------------|-----------|
| Unfixed_c-MET.fcs          | 21.6      |
| Unfixed_IgG1.fcs           | 18.3      |
| Unfixed_Secondary Only.fcs | 18.9      |

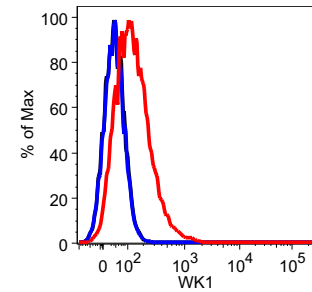

| Sample                     | Mean:PE-A |
|----------------------------|-----------|
| Unfixed_c-MET.fcs          | 159       |
| Unfixed_IgG1.fcs           | 42.8      |
| Unfixed_Secondary only.fcs | 43.1      |

# SOX2

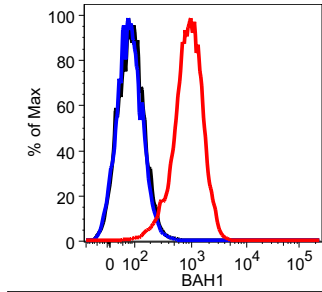

| Sample              | Mean:PE-A |
|---------------------|-----------|
| Fixed_Sox2.fcs      | 1016      |
| Fixed_IgG1.fcs      | 83.5      |
| Fixed_Secondary.fcs | 89.5      |

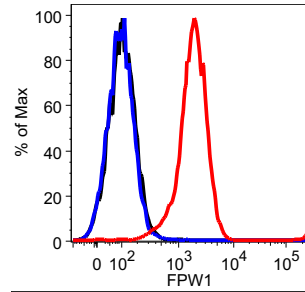

| Sample                   | Mean:PE-A |
|--------------------------|-----------|
| Fixed_Sox2.fcs           | 3401      |
| Fixed_IgG1.fcs           | 148       |
| Fixed_Secondary Only.fcs | 216       |

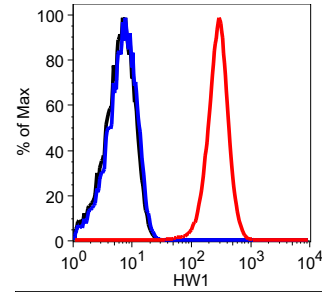

| Sample                         | Mean:PE-A |
|--------------------------------|-----------|
| Fixed Cells_Sox2.fcs           | 318       |
| Fixed Cells_IgG1.fcs           | 7.52      |
| Fixed Cells_Secondary Only.fcs | 7.07      |

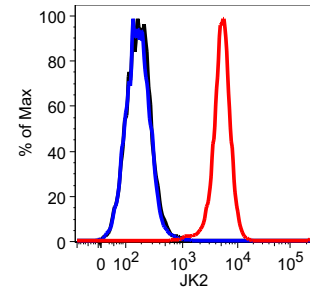

| Sample                   | Mean:PE-A |
|--------------------------|-----------|
| Fixed_Sox2.fcs           | 6033      |
| Fixed_IgG1.fcs           | 251       |
| Fixed_Secondary Only.fcs | 197       |

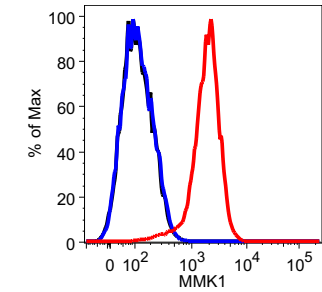

| Sample              | Mean:PE-A |
|---------------------|-----------|
| Fixed_SOX2.fcs      | 2133      |
| Fixed_IgG1.fcs      | 131       |
| Fixed_Secondary.fcs | 128       |

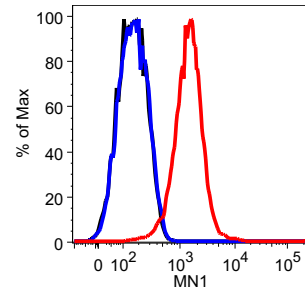

| Sample              | Mean:PE-A |
|---------------------|-----------|
| Fixed_SOX2.fcs      | 2053      |
| Fixed_IgG1.fcs      | 183       |
| Fixed_Secondary.fcs | 172       |

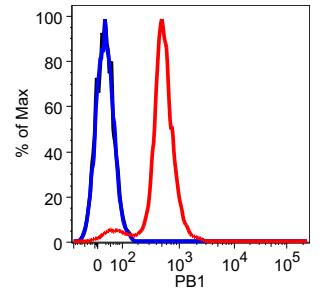

| Sample                   | Mean:PE-A |
|--------------------------|-----------|
| Fixed_Sox2.fcs           | 555       |
| Fixed_Secondary Only.fcs | 25.5      |
| Fixed_IgG1.fcs           | 25.7      |

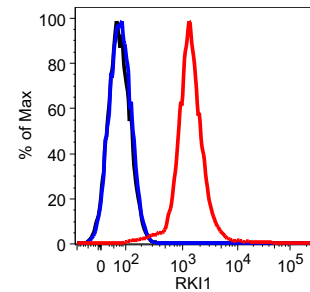

| Sample              | Mean:PE-A |
|---------------------|-----------|
| Fixed_SOX2.fcs      | 1898      |
| Fixed_IgG1.fcs      | 78.2      |
| Fixed_Secondary.fcs | 75.4      |

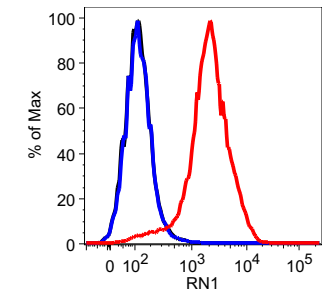

| Sample              | Mean:PE-A |
|---------------------|-----------|
| Fixed_SOX2.fcs      | 2845      |
| Fixed_IgG1.fcs      | 135       |
| Fixed_Secondary.fcs | 132       |

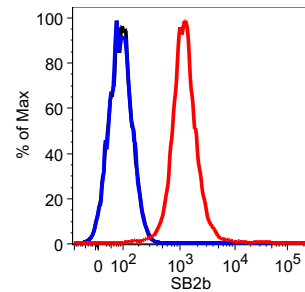

| Sample              | Mean:PE-A |
|---------------------|-----------|
| Fixed_SOX2.fcs      | 1897      |
| Fixed_IgG1.fcs      | 93.6      |
| Fixed_Secondary.fcs | 93.6      |

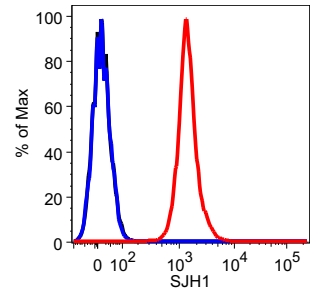

| Sample                   | Mean:PE-A |
|--------------------------|-----------|
| Fixed_SOX2.fcs           | 1645      |
| Fixed_IgG1.fcs           | 12.7      |
| Fixed_Secondary Only.fcs | 13.1      |

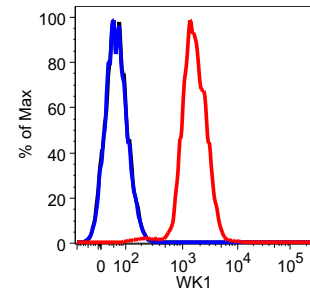

| Sample              | Mean:PE-A |
|---------------------|-----------|
| Fixed_SOX2.fcs      | 2001      |
| Fixed_IgG1.fcs      | 67.4      |
| Fixed_Secondary.fcs | 64.1      |



# Nestin

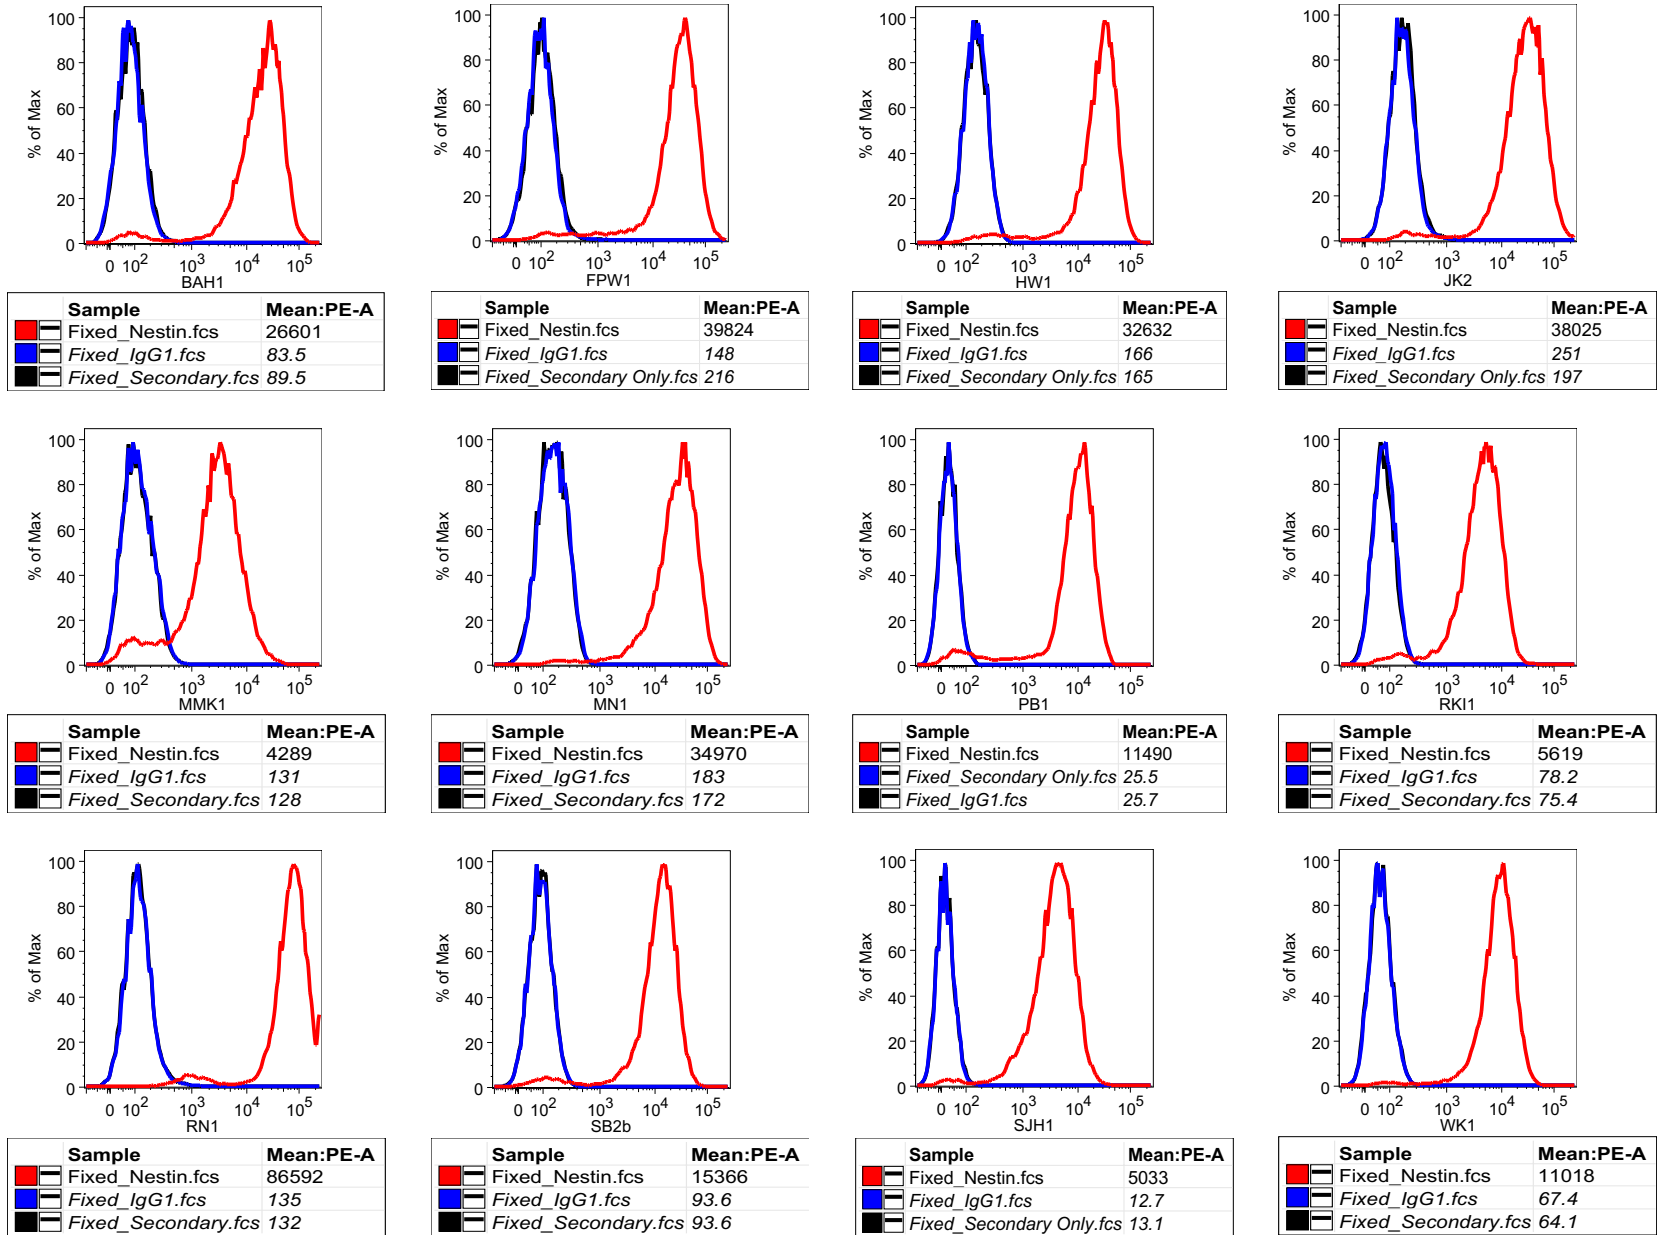

# GFAP

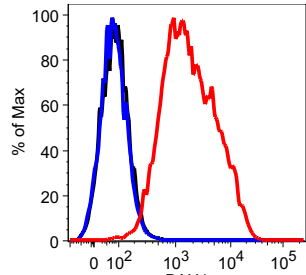

| Sample              | Mean:PE-A |
|---------------------|-----------|
| Fixed_GFAP.fcs      | 3205      |
| Fixed_IgG1.fcs      | 83.5      |
| Fixed_Secondary.fcs | 89.5      |

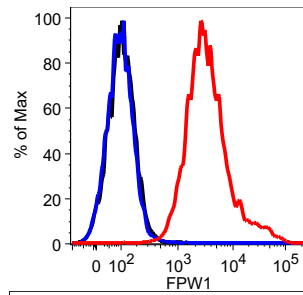

| Sample                   | Mean:PE-A |
|--------------------------|-----------|
| Fixed_GFAP.fcs           | 6208      |
| Fixed_IgG1.fcs           | 148       |
| Fixed_Secondary Only.fcs | 216       |

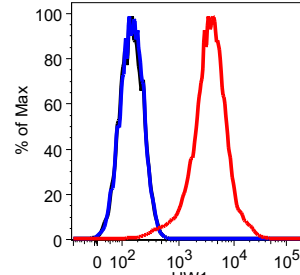

| Sample                   | Mean:PE-A |
|--------------------------|-----------|
| Fixed_GFAP.fcs           | 4747      |
| Fixed_IgG1.fcs           | 166       |
| Fixed_Secondary Only.fcs | 165       |

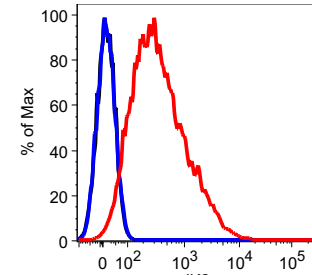

| Sample                   | Mean:PE-A |
|--------------------------|-----------|
| Fixed_GFAP.fcs           | 715       |
| Fixed_IgG1.fcs           | 9.17      |
| Fixed_Secondary Only.fcs | 8.76      |

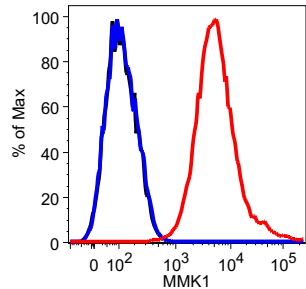

| Sample              | Mean:PE-A |
|---------------------|-----------|
| Fixed_GFAP.fcs      | 9746      |
| Fixed_IgG1.fcs      | 131       |
| Fixed_Secondary.fcs | 128       |

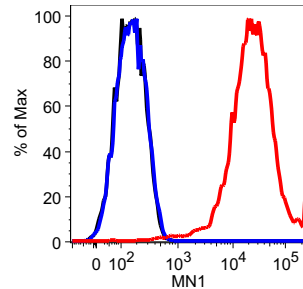

| Sample              | Mean:PE-A |
|---------------------|-----------|
| Fixed_GFAP.fcs      | 36510     |
| Fixed_IgG1.fcs      | 183       |
| Fixed_Secondary.fcs | 172       |

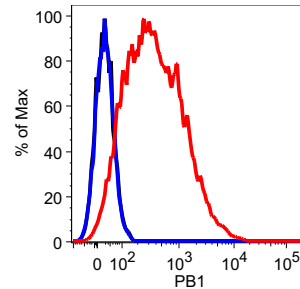

| Sample                   | Mean:PE-A |
|--------------------------|-----------|
| Fixed_GFAP.fcs           | 733       |
| Fixed_Secondary Only.fcs | 25.5      |
| Fixed_IgG1.fcs           | 25.7      |

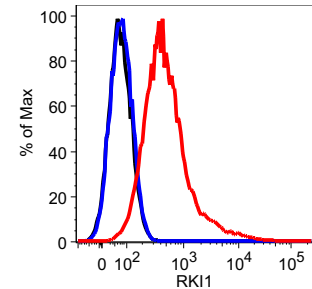

| Sample              | Mean:PE-A |
|---------------------|-----------|
| Fixed_GFAP.fcs      | 1085      |
| Fixed_IgG1.fcs      | 78.2      |
| Fixed_Secondary.fcs | 75.4      |

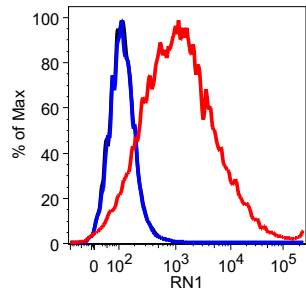

| Sample              | Mean:PE-A |
|---------------------|-----------|
| Fixed_GFAP.fcs      | 5004      |
| Fixed_IgG1.fcs      | 135       |
| Fixed_Secondary.fcs | 132       |

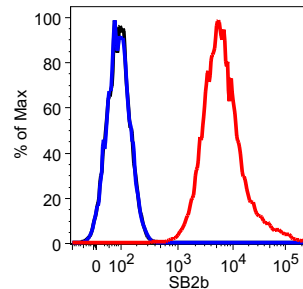

| Sample              | Mean:PE-A |
|---------------------|-----------|
| Fixed_GFAP.fcs      | 11626     |
| Fixed_IgG1.fcs      | 93.6      |
| Fixed_Secondary.fcs | 93.6      |

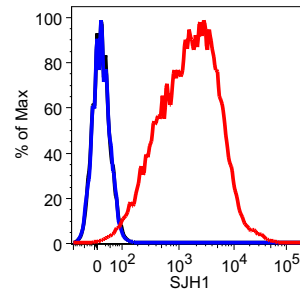

| Sample                   | Mean:PE-A |
|--------------------------|-----------|
| Fixed_GFAP.fcs           | 3022      |
| Fixed_IgG1.fcs           | 12.7      |
| Fixed_Secondary Only.fcs | 13.1      |

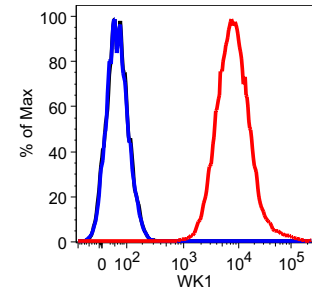

| Sample              | Mean:PE-A |
|---------------------|-----------|
| Fixed_GFAP.fcs      | 11625     |
| Fixed_IgG1.fcs      | 67.4      |
| Fixed_Secondary.fcs | 64.1      |

# Beta-III Tubulin

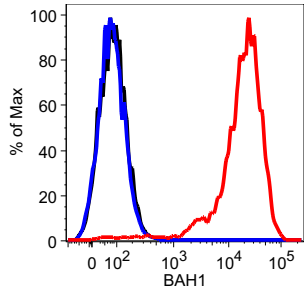

| Sample                     | Mean:PE-A |
|----------------------------|-----------|
| Fixed_Beta-III Tubulin.fcs | 24511     |
| Fixed_IgG1.fcs             | 83.5      |
| Fixed_Secondary.fcs        | 89.5      |

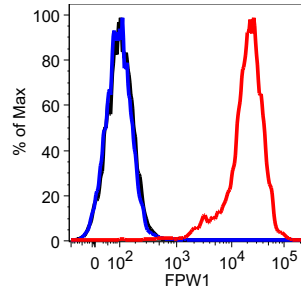

| Sample                     | Mean:PE-A |
|----------------------------|-----------|
| Fixed_Beta-III Tubulin.fcs | 24810     |
| Fixed_IgG1.fcs             | 148       |
| Fixed_Secondary Only.fcs   | 216       |

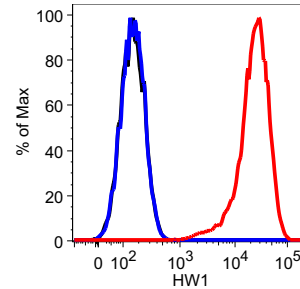

| Sample                     | Mean:PE-A |
|----------------------------|-----------|
| Fixed_Beta-III Tubulin.fcs | 28204     |
| Fixed_IgG1.fcs             | 166       |
| Fixed_Secondary Only.fcs   | 165       |

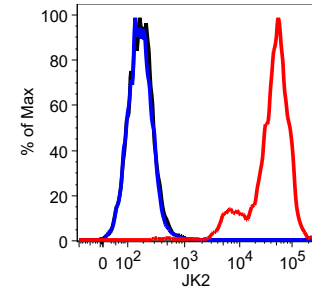

| Sample                     | Mean:PE-A |
|----------------------------|-----------|
| Fixed_Beta-III Tubulin.fcs | 52810     |
| Fixed_IgG1.fcs             | 251       |
| Fixed_Secondary Only.fcs   | 197       |

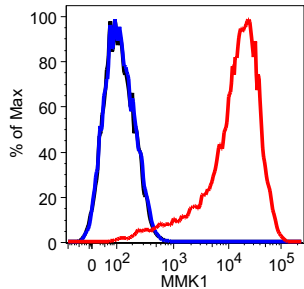

| Sample                     | Mean:PE-A |
|----------------------------|-----------|
| Fixed_Beta-III Tubulin.fcs | 20192     |
| Fixed_IgG1.fcs             | 131       |
| Fixed_Secondary.fcs        | 128       |

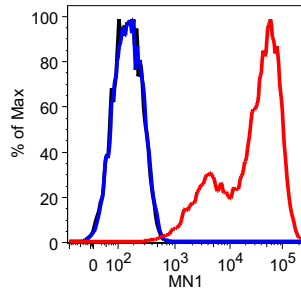

| Sample                     | Mean:PE-A |
|----------------------------|-----------|
| Fixed_Beta-III Tubulin.fcs | 44200     |
| Fixed_IgG1.fcs             | 183       |
| Fixed_Secondary.fcs        | 172       |

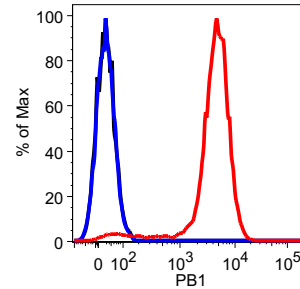

| Sample                     | Mean:PE-A |
|----------------------------|-----------|
| Fixed_beta-III Tubulin.fcs | 4993      |
| Fixed_Secondary Only.fcs   | 25.5      |
| Fixed_IgG1.fcs             | 25.7      |

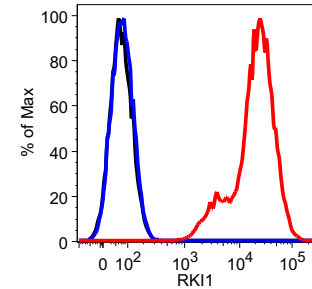

| Sample                     | Mean:PE-A |
|----------------------------|-----------|
| Fixed_Beta-III Tubulin.fcs | 26637     |
| Fixed_IgG1.fcs             | 78.2      |
| Fixed_Secondary.fcs        | 75.4      |

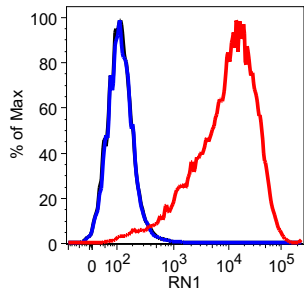

| Sample                     | Mean:PE-A |
|----------------------------|-----------|
| Fixed_Beta-III Tubulin.fcs | 16848     |
| Fixed_IgG1.fcs             | 135       |
| Fixed_Secondary.fcs        | 132       |

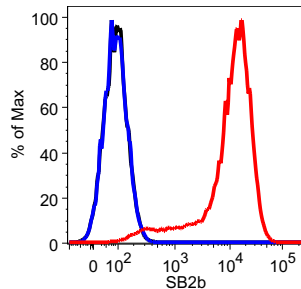

| Sample                     | Mean:PE-A |
|----------------------------|-----------|
| Fixed_Beta-III Tubulin.fcs | 14266     |
| Fixed_IgG1.fcs             | 93.6      |
| Fixed_Secondary.fcs        | 93.6      |

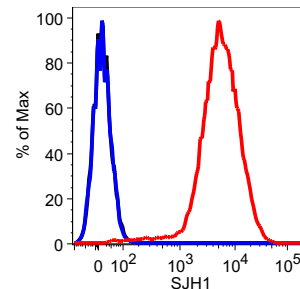

| Sample                     | Mean:PE-A |
|----------------------------|-----------|
| Fixed_Beta-III Tubulin.fcs | 7388      |
| Fixed_IgG1.fcs             | 12.7      |
| Fixed_Secondary Only.fcs   | 13.1      |

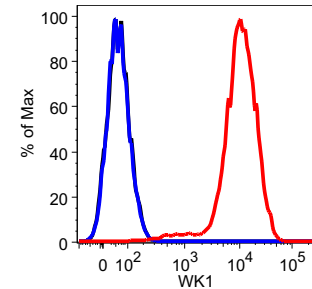

| Sample                     | Mean:PE-A |
|----------------------------|-----------|
| Fixed_Beta-III Tubulin.fcs | 13057     |
| Fixed_IgG1.fcs             | 67.4      |
| Fixed_Secondary.fcs        | 64.1      |

# MBP

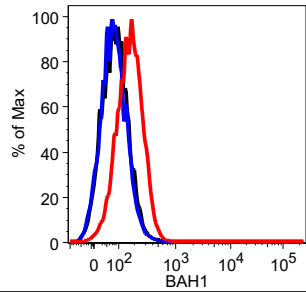

| Sample              | Mean:PE-A |
|---------------------|-----------|
| Fixed_MBP.fcs       | 179       |
| Fixed_IgG1.fcs      | 83.5      |
| Fixed_Secondary.fcs | 89.5      |

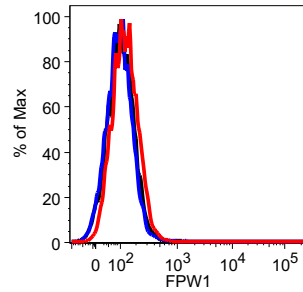

| Sample                   | Mean:PE-A |
|--------------------------|-----------|
| Fixed_MBP.fcs            | 143       |
| Fixed_IgG1.fcs           | 148       |
| Fixed_Secondary Only.fcs | 216       |

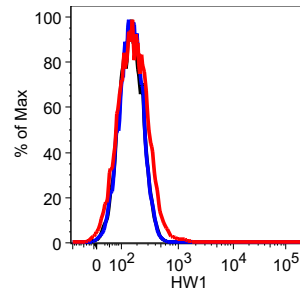

| Sample                   | Mean:PE-A |
|--------------------------|-----------|
| Fixed_MBP.fcs            | 196       |
| Fixed_IgG1.fcs           | 166       |
| Fixed_Secondary Only.fcs | 165       |

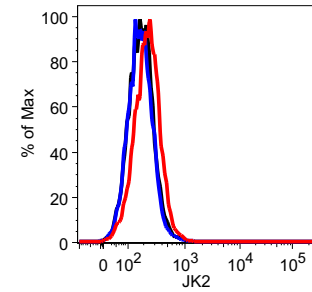

| Sample                   | Mean:PE-A |
|--------------------------|-----------|
| Fixed_MBP.fcs            | 331       |
| Fixed_IgG1.fcs           | 251       |
| Fixed_Secondary Only.fcs | 197       |

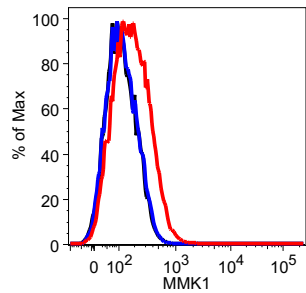

| Sample              | Mean:PE-A |
|---------------------|-----------|
| Fixed_MBP.fcs       | 255       |
| Fixed_IgG1.fcs      | 131       |
| Fixed_Secondary.fcs | 128       |

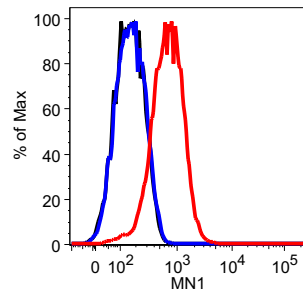

| Sample              | Mean:PE-A |
|---------------------|-----------|
| Fixed_MBP.fcs       | 1038      |
| Fixed_IgG1.fcs      | 183       |
| Fixed_Secondary.fcs | 172       |

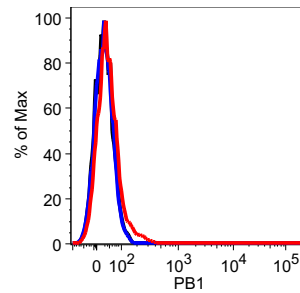

| Sample                   | Mean:PE-A |
|--------------------------|-----------|
| Fixed_MBP.fcs            | 43.8      |
| Fixed_Secondary Only.fcs | 25.5      |
| Fixed_IgG1.fcs           | 25.7      |

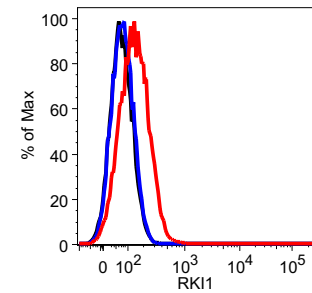

| Sample              | Mean:PE-A |
|---------------------|-----------|
| Fixed_MBP.fcs       | 192       |
| Fixed_IgG1.fcs      | 78.2      |
| Fixed_Secondary.fcs | 75.4      |

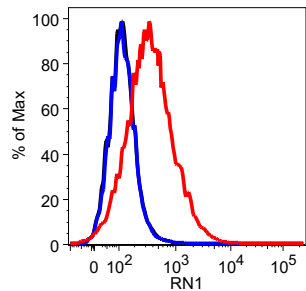

| Sample              | Mean:PE-A |
|---------------------|-----------|
| Fixed_MBP.fcs       | 676       |
| Fixed_IgG1.fcs      | 135       |
| Fixed_Secondary.fcs | 132       |

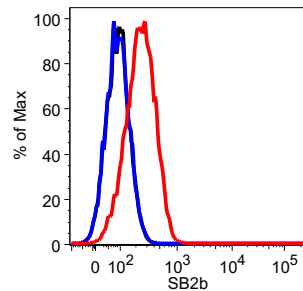

| Sample              | Mean:PE-A |
|---------------------|-----------|
| Fixed_MBP.fcs       | 275       |
| Fixed_IgG1.fcs      | 93.6      |
| Fixed_Secondary.fcs | 93.6      |

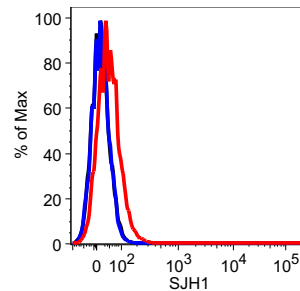

| Sample                   | Mean:PE-A |
|--------------------------|-----------|
| Fixed_MBP.fcs            | 80.1      |
| Fixed_IgG1.fcs           | 12.7      |
| Fixed_Secondary Only.fcs | 13.1      |

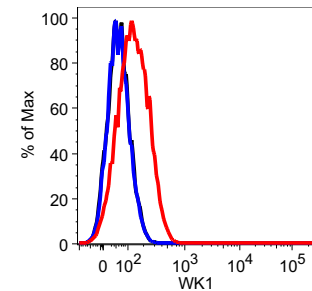

| Sample              | Mean:PE-A |
|---------------------|-----------|
| Fixed_MBP.fcs       | 202       |
| Fixed_IgG1.fcs      | 67.4      |
| Fixed_Secondary.fcs | 64.1      |
